# Supplementary material for: Transcriptomic and Drug Discovery Analyses Reveal Natural Compounds Targeting the KDM4 Subfamily as Promising Adjuvant Treatments in Cancer
Source: Front Genet. 2022 Apr 11;13:860924. doi: 10.3389/fgene.2022.860924 (PMC9036480; doi:10.3389/fgene.2022.860924)
Supplement: Supplementary file 2 [file DataSheet3.xlsx]

## Sheet: Venn
Supplementary File 3. Shared ligands between the KDM4 subfamily. Molecules at each intersection showed in Supplementary Figure 1 (results are only for the HOLO form of each KDM4).
KDM4A:KDM4B	KDM4A:KDM4C	KDM4A:KDM4D	KDM4A:KDM4E	KDM4B:KDM4C	KDM4B:KDM4D	KDM4B:KDM4E	KDM4C:KDM4D	KDM4C:KDM4E	KDM4D:KDM4E	KDM4A:KDM4B:KDM4D	KDM4A:KDM4C:KDM4D	KDM4A:KDM4D:KDM4E	KDM4B:KDM4C:KDM4D	KDM4B:KDM4D:KDM4E	KDM4C:KDM4D:KDM4E	KDM4A:KDM4B:KDM4C:KDM4D	KDM4A:KDM4B:KDM4D:KDM4E	KDM4A:KDM4C:KDM4D:KDM4E	KDM4B:KDM4C:KDM4D:KDM4E	KDM4A:KDM4B:KDM4C:KDM4D:KDM4E
PTERIC ACID	2'-C-METHYLCYTIDINE	2-(3-GUANIDINOPHENYL)-3-MERCAPTOPROPANOIC ACID	GLYCOCYAMINE	PTERIN-6-YL-METHYL-MONOPHOSPHATE	1-(2-ETHANONE)-2-HYDROXY-2-(1-AMINO-2-METHYL-2-ETHANOL)-4-(2-DIMETHYL)ETHANE-IMIDAZOLINE-5-ONE;CHROMOPHORE (THR-LEU-GLY)	GAXILOSE	2'-CYTIDYLIC ACID	CNP0181746	D-GLUCOSE	7-METHYL-7,8-DIHYDROGUANOSINE 5'-(DIHYDROGEN PHOSPHATE)	THYMIDINE-5'-THIOPHOSPHATE	LEVOGLUCOSE	THIODIGALACTOSIDE	D-ERYTHROSE 4-PHOSPHATE	N(5)-[(HYDROXYAMINO)(IMINO)METHYL]-L-ORNITHINE	-)-EPIGALLOCATECHIN GALLATE	RIBAVIRIN MONOPHOSPHATE	L-[(N-HYDROXYAMINO)CARBONYL]PHENYLALANINE	DEOXYAMIDINOPROCLAVAMINIC ACID	IMIPENEM
PTEROIC ACID	(2S)-2-AMMONIO-3-[5-(2-METHYL-2-PROPANYL)-3-OXIDO-1,2-OXAZOL-4-YL]PROPANOATE	N-ACETYL-ALPHA-NEURAMINIC ACID		R-2-{[4'-METHOXY-(1,1'-BIPHENYL)-4-YL]-SULFONYL}-AMINO-6-METHOXY-HEX-4-YNOIC ACID	2-(BETA-D-GLUCOPYRANOSYL)-5-METHYL-1,3,4-BENZOTHIAZOLE	SN-GLYCERO-3-PHOSPHOETHANOLAMINE	(R)-2-(FORMYLOXY)-3-(PHOSPHONOOXY)PROPYL PENTANOATE		N(G)-IMINOETHYLORNITHINE	ZANAMIVIR	5-METHYL-2'-FLUOROARAURACIL F-18	D-GLUCITOL 6-PHOSPHATE	DIHYDROMYRICETIN	FOSAMPRENAVIR	PSEUDOURIDINE-5'-MONOPHOSPHATE	PYRITINOL	ACENEURAMIC ACID	4-O-(4,6-DIDEOXY-4-{[4,5,6-TRIHYDROXY-3-(HYDROXYMETHYL)CYCLOHEX-2-EN-1-YL]AMINO}-BETA-D-LYXO-HEXOPYRANOSYL)-ALPHA-D-ERYTHRO-HEXOPYRANOSE	VOGLIBOSE	PYRIDOXINE PHOSPHATE
CNP0034418	THIO-ATPA	9-AMINO-2-DEOXY-2,3-DEHYDRO-N-ACETYL-NEURAMINIC ACID		XYLAROHYDROXAMATE	GABEXATE	CITRULLINE	TREHALOSE-6-PHOSPHATE		BETA-METHYLLACTOSIDE	1-ACETYL-2-LYSO-SN-GLYCERO-3-PHOSPHOETHANOLAMINE	SP-420	(2R)-3-{[(BENZYLAMINO)CARBONYL]AMINO}-2-HYDROXYPROPANOIC ACID	2-OXY-4-HYDROXY-5-(2-HYDRAZINOPYRIDINE)PHENYLALANINE	GLUCOSE-6-PHOSPHATE	NOR-NOHA	CYSTEINE-METHYLENE-CARBAMOYL-1,10-PHENANTHROLINE	D-[(N-HYDROXYAMINO)CARBONYL]PHENYLALANINE	HYDROCORTISONE	NEOPTERIN	LACTITOL
CNP0107391	THYMIDINE	N-BENZYL-3-(ALPHA-D-GALACTOPYRANOSYLOXY)BENZAMIDE		CNP0275914	TAXIFOLIN		1,4-DEOXY-4-((5-HYDROXYMETHYL-2,3,4-TRIHYDROXYCYCLOHEX-5-ENYL)AMINO)FRUCTOSE		MANNOSE	CIANIDANOL	2,4-DEOXY-4-GUANIDINO-5-N-ACETYL-NEURAMINIC ACID	N-ACETYL-BETA-NEURAMINIC ACID	CREATINOLFOSFATE	3-DEHYDROQUINIC ACID	PHENYLALANINE-N-SULFONAMIDE	2-RIBOFURANOSYL-3-IODO-2,3-DIHYDRO-1H-PYRAZOLO[3,4-D]PYRIMIDIN-4-YLAMINE	5-NITROSO-6-RIBITYL-AMINO-2,4(1H,3H)-PYRIMIDINEDIONE	SWERTIAMARIN	TILARGININE	ALPHA-ARBUTIN
CNP0222564	CNP0225035	[N-(BENZYLOXYCARBONYL)AMINO](4-AMIDINOPHENYL)METHANE-PHOSPHONATE			DIHYDROXYPHENYLGLYCINE		4-GUANIDINOBENZOIC ACID		3-AMINO-4,5-DIHYDROXY-CYCLOHEX-1-ENECARBOXYLATE	(1S,2S,3R,4S,5S)-2,3,4-TRIHYDROXY-5-(HYDROXYMETHYL)CYCLOHEXYL (1E)-2-PHENYL-N-(SULFOOXY)ETHANIMIDOTHIOATE	(5-METHYL-6-OXO-1,6-DIHYDRO-PYRIDIN-3-YL)-1,2-DIDEOXY-RIBOFURANOSE-5-MONOPHOSPHATE	5-(ACETYLAMINO)-3,5-DIDEOXY-3-FLUORO-D-ERYTHRO-ALPHA-L-MANNO-NON-2-ULOPYRANOSONIC ACID	4-ACETAMIDO-2,4-DIDEXOY-D-GLYCERO-BETA-D-GALACTO-OCTOPYRANOSYLPHOSPHONIC ACID	BIOPTERIN	N-OMEGA-PROPYL-L-ARGININE	3-AMINO-6-HYDROXY-TYROSINE	ARGININE	2'-DEOXYURIDINE	5-N-ALLYL-ARGININE	CHLOROGENIC ACID
	CNP0298041	BMSC-0013			N-[4-HYDROXYMETHYL-CYCLOHEXAN-6-YL-1,2,3-TRIOL]-4,6-DIDEOXY-4-AMINOGLUCOPYRANOSIDE		HYDROCORTISONE SUCCINATE		GALACTOSE	BENGENIN	2,5-DIAMINOPYRIMIDIN-4,6-DIOL	(S)-2-AMINO-4-[(2S,3R)-2,3,5-TRIHYDROXY-4-OXO-PENTYL]MERCAPTO-BUTYRIC ACID	2-DEOXY-2-ACETAMIDO-BETA-D-GALACTOSE-4-SULFATE	D-THREO-NEOPTERIN	[(1S)-4-(1-AMINOBUTYLIDENEAMINO)-1-CARBOXYBUTYL]AZANIUM	CARBOXYETHYLLUMAZINE	N-ACETYLMANNOSAMINE		D-(+)-TREHALOSE DIHYDRATE	BENSERAZIDE
	IGURATIMOD	6-O-CAPRYLOYLSUCROSE			5-(6-D-RIBITYLAMINO-2,4-DIHYDROXYPYRIMIDIN-5-YL)-1-PENTYL-PHOSPHONIC ACID		[[N-(BENZYLOXYCARBONYL)AMINO]METHYL]PHOSPHATE		DIPYRIDAMOLE	CNP0002425	2'-FLUORO-5-ETHYLARABINOSYLURACIL	L-GLUCONIC ACID	2-(ACETYLAMINO)-2-DEOXY-4-O-SULFO-ALPHA-D-GALACTOPYRANOSE	(2R,3R,4S,5R)-2-ACETAMIDO-3,4-DIHYDROXY-5-HYDROXYMETHYL-PIPERIDINE	AICA RIBONUCLEOTIDE	D-[3-HYDROXY-2-METHYL-5-PHOSPHONOOXYMETHYL-PYRIDIN-4-YLMETHYL]-N,O-CYCLOSERYLAMIDE	N-ACETYL-L-ARGININE		DL-CITRULLINE	CANAVANINE
		2-DEOXY-D-GLUCITOL 6-(E)-VINYLHOMOPHOSPHONATE			BETA-D-ARABINOFURANOSE 5-PHOSPHATE		5-(3-AMINO-4,4-DIHYROXY-BUTYLSULFANYLMETHYL)-TETRAHYDRO-FURAN-2,3,4-TRIOL		OUABAIN	CNP0203745	5-BROMOTHIENYLDEOXYURIDINE	AZACITIDINE	3-(5-AMINO-7-HYDROXY-(1,2,3)TRIAZOLO(4,5-D)PYRIMIDIN-2-YL)BENZOIC ACID	(2R,3R,4R,5R)-4,5-DIHYDROXY-2-(HYDROXYMETHYL)-6-OXO-3-PIPERIDINYL BETA-D-GLUCOPYRANOSIDE	D-ARGININE	PMP-HYDROXYISOXAZOLE, PYRIDOXAMINE-5-PHOSPHATE-HYDROXYISOXAZOLE	4R-FLUORO-N6-ETHANIMIDOYL-L-LYSINE		SUCRALOSE	2-DEOXY-2-AMINO GLUCITOL-6-PHOSPHATE
		5-IODO-2'-DEOXYURIDINE-5'-MONOPHOSPHATE			GLUCOSAMINE 4-PHOSPHATE		LINCOMYCIN		DEHYDROASCORBIC ACID	CNP0216191	FIACITABINE	CNP0125603	TREHALOSE	GLUTAMINE HYDROXAMATE	MINOXIDIL SULPHATE	1-[(4S)-4-AMINO-5-(1,3-BENZOTHIAZOL-2-YL)-5-OXOPENTYL]GUANIDINE	GW-274150			SORBITOL
		N-METHYL-PYRIDOXAL-5'-PHOSPHATE			NAPHTHALENE-1,2,4,5,7-PENTOL		HIDROSMIN		BETA-D-GLUCURONIC ACID	CNP0237320	SORIVUDINE	CNP0128114	CARBILEV (CARBIDOPA)	CNP0262228	SILIBININ	RIBOFLAVIN	N-ACETYLGLUCOSAMINE			SUCROSE
		INDIRUBIN-5-SULPHONATE			FISETIN		METHYLDOPA		BALANOL	CNP0299696	EPIGALLOCATECHIN GALLATE	CNP0211501	CNP0042460	DECITABINE (2´┐¢´┐¢-DEOXY-5-AZACYTIDINE)		FIALURIDINE	PENTOSTATIN			DROXIDOPA
		[(3R)-3-(METHYLCARBAMOYL)-2-{[(2-METHYL-2-PROPANYL)OXY]CARBONYL}-1,2,3,4-TETRAHYDRO-7-ISOQUINOLINYL]SULFAMIC ACID			(5R,6S,7S,8S)-5-HYDROXYMETHYL-6,7,8-TRIHYDROXY-TETRAZOLO[1,5-A]PIPERIDINE		BETA-D-GALACTOPYRANURONIC ACID		4,5-DEHYDRO-D-GLUCURONIC ACID	CNP0308381	3-NITRO-L-TYROSINE	CNP0312579	CNP0076062	FRUCTOSE		EPIGALLO CATECHIN GALLATE	AUCUBIN			ACILAC (LACTULOSE)
		URIDINE MONOPHOSPHATE			2-AMINO-3-(3-HYDROXY-7,8-DIHYDRO-6H-CYCLOHEPTA[D]-4-ISOXAZOLYL)PROPIONIC ACID		4-(HYDROGEN SULFATE)-BETA-D-GALACTOPYRANOSE		3-DEOXY-ALPHA-D-MANNO-OCT-2-ULOPYRANOSONIC ACID	CNP0388108	CNP0137097	GLUCOSAMINE	CNP0091544	GALLIC ACID		ISOQUERCETIN	SALIDROSIDE			AESCULIN
		BRIVUDINE MONOPHOSPHATE			ASCORBYL GLUCOSIDE		5-(3-{3-[3-HYDROXY-2-(METHOXYCARBONYL)PHENOXY]PROPENYL}PHENYL)-4-(HYDROXYMETHYL)ISOXAZOLE-3-CARBOXYLIC ACID		FUCITOL	SULISOBENZONE	CNP0148933	HEMATOXYLIN	CNP0206814	SILYMARIN		ISOQUERCITRIN				ALDOMET (METHYLDOPA)
		PHENFORMIN			CIDOFOVIR		(2R,3R)-2,3-DIHYDROXY-4-OXO-4-(PROPYLAMINO)BUTANOIC ACID		ALPHA-D-GALACTURONIC ACID		CNP0170892	GLUCOSAMINE SULFATE	CNP0232196	VIDAZA (AZACITIDINE)		1,3,4-TRIHYDROXY-5-(3-PHENOXYPROPYL)-CYCLOHEXANE-1-CARBOXYLIC A CID				ARBUTIN
		7-(ALPHA-D-GLUCOPYRANOSYLOXY)-4-METHYL-2H-1-BENZOPYRAN-2-ONE			PHOSPHORYLATED DIHYDROPTEROATE		CYCLIC 3',5'-THYMIDINE MONOPHOSPHATE		8,9,10-TRIHYDROXY-7-HYDROXYMETHYL-2-THIOXO-6-OXA-1,3-DIAZA-SPIRO[4.5]DECAN-4-ONE		CNP0173738	HARPAGOSIDE	CNP0257919	XANTHOPTERIN		PIRISUDANOL				ASCORBIC ACID
		THYMIDINE MONOPHOSPHATE			VALTORCITABINE		TRICETIN		5-PHOSPHO-D-ARABINOHYDROXAMIC ACID		CNP0183807		CNP0267053			BAICALIN				CIDOFOVIR
		CNP0009877			BARICITINIB		NETIVUDINE		FR117016		CNP0210989		CNP0299539			CLEVUDINE				D-GLUCONIC
		CNP0028918			CNP0098686		EDOTECARIN		DECITABINE		CNP0215480		CNP0337304			CNP0021869				D-GLUCURONIC
		CNP0050396			CNP0107860		CNP0067020		OTERACIL		CNP0226280		CNP0347498			CNP0070170				D-MANNITOL
		CNP0058667			CNP0113067		CNP0076794		2-DEOXY-GLUCITOL-6-PHOSPHATE		CNP0260658		CNP0359693			CNP0099882				DEXTROSE
		CNP0076373			CNP0155073		CNP0083624		6S-5,6,7,8-TETRAHYDROBIOPTERIN		CNP0276176		CNP0360795			CNP0132701				GABEXATE MESYLATE
		CNP0150788			CNP0180536		CNP0109274		2,6-ANHYDRO-3-DEOXY-3-FLUORONONONIC ACID		CNP0365444		CNP0389368			CNP0154417				GASTRODIN
		CNP0155799			CNP0180599		CNP0120055		SULPIRIDE		CYNARIN		CNP0394280			CNP0184709				GENIPOSIDE
		CNP0155999			CNP0180640		CNP0135415		LEVODOPA		CYROMAZINE		CNP0399248			CNP0220995				ISOMALT
		CNP0237115			CNP0204497		CNP0136384		MANNOSE 6-PHOSPHATE		FLOXURIDINE		CNP0424178			CNP0259668				L-(-)-´┐¢´┐¢-METHYLDOPA
		CNP0242064			CNP0207153		CNP0138517		MANNITOL		I-INOSITOL		CYTIDINE			CNP0262256				LACTOSE
		CNP0243580			CNP0218094		CNP0162890		D-MANNOSE 1-PHOSPHATE		TEDIZOLID PHOSPHATE		DEPOCYT (CYTARABINE)			CNP0303537				LUTEOLIN
		CNP0245053			CNP0241055		CNP0170439		N-ACETYL-L-CITRULLINE		ERIODICTYOL					CNP0304362				MEGLUMINE
		CNP0253826			CNP0263824		CNP0203465		QUISQUALIC ACID		TYZEKA (TELBIVUDINE)					CNP0346620				MORIN
		CNP0254909			CNP0283960		CNP0235948		6-HYDROXYMETHYLPTERIN							CNP0359434				NUTRESTORE (GLUTAMINE)
		CNP0289604			CNP0285156		CNP0265773		GLUCONOLACTONE							CNP0410456				POLYDATIN
		CNP0289609			CNP0304580		CNP0274447		PSICOSE							CNP0417515				RELENZA (ZANAMIVIR)
		CNP0302804			CNP0316754		CNP0316602		L-HOMOARGININE							CNP0419623				ROSMARINIC ACID
		CNP0346397			CNP0319966		CNP0338916		CNP0003530							CNP0423761				HELICIDE
		FAMOTIDINE			CNP0331731		CNP0361901		CNP0021838							CNP0424977				L-CITRULLINE
		CURCULIGOSIDE			CNP0359459		CNP0362701		CNP0021839							DIOSMIN				SCUTELLARIN
		VERBASCOSIDE			CNP0367137		DAIDZIN		CNP0021856							DORIPENEM HYDRATE				LOGANIN
		DORIPENEM			CNP0399235		AMLEXANOX		CNP0045796							NARINGIN DIHYDROCHALCONE				CATALPOL
					CNP0403201		SUCCINYLSULFATHIAZOLE		CNP0081446							NARINGIN				(-)-EPICATECHIN GALLATE
					CNP0405183				CNP0084225							PUERARIN				DL-GLUTAMINE
					CNP0423753				CNP0102501							SOPHORICOSIDE				(+)-CATECHIN
					CNP0425736				CNP0131606							QUERCITRIN				(-)EPICATECHIN
					CNP0436114				CNP0133123							LIQUIRITIN				DANSHENSU
					KAEMPFEROL				CNP0137334							PROANTHOCYANIDINS				MELIBIOSE
					ISORHAMNETIN				CNP0148151							HYPEROSIDE				N-ACETYLNEURAMINIC ACID
									CNP0156516							VITEXIN				MALTOSE
									CNP0164312											PYRITHIOXIN
									CNP0175192											LACTITOL MONOHYDRATE
									CNP0176142											DL-ARGININE
									CNP0189411											L-ARGININE
									CNP0210555											HOMOORIENTIN
									CNP0234324											SALICIN
									CNP0238392											TAXIFOLIN (DIHYDROQUERCETIN)
									CNP0246507											URIDINE
									CNP0249133
									CNP0258585
									CNP0262427
									CNP0268094
									CNP0278027
									CNP0295348
									CNP0306548
									CNP0315964
									CNP0316375
									CNP0325548
									CNP0363646
									CNP0365029
									CNP0368756
									CNP0396586
									CNP0410458
									CNP0433705
									CNP0435990
									OLEUROPEIN
									OROTIC ACID
									XYLITOL
