# Supplementary material for: Transcriptomic and Drug Discovery Analyses Reveal Natural Compounds Targeting the KDM4 Subfamily as Promising Adjuvant Treatments in Cancer
Source: Front Genet. 2022 Apr 11;13:860924. doi: 10.3389/fgene.2022.860924 (PMC9036480; doi:10.3389/fgene.2022.860924)
Supplement: Supplementary file 4 [file DataSheet2.xlsx]

## Sheet: SupplementaryFile2
Supplementary File 2. Top 100 ligands for each KDM4 model selected.
DB	Form	KDM	pdbID	ligand	FRED/Chemgauss4 score
coconut	APO	4A	5F32	CNP0230229_2_170	-19.6368
coconut	APO	4A	5F32	CNP0230229_1_102	-19.5193
coconut	APO	4A	5F32	CNP0229004_1_149	-19.2235
coconut	APO	4A	5F32	CNP0128114_1_22	-19.2046
coconut	APO	4A	5F32	CNP0304362_1_103	-18.601
coconut	APO	4A	5F32	CNP0312579_1_161	-18.305
coconut	APO	4A	5F32	CNP0294420_1_54	-18.2783
coconut	APO	4A	5F32	CNP0311915_1_19	-18.2093
coconut	APO	4A	5F32	CNP0278027_1_41	-18.0875
coconut	APO	4A	5F32	CNP0141631_1_76	-18.0666
coconut	APO	4A	5F32	CNP0070170_3_178	-18.0487
coconut	APO	4A	5F32	CNP0070170_1_178	-18.0487
coconut	APO	4A	5F32	CNP0070170_4_178	-18.0487
coconut	APO	4A	5F32	CNP0070170_2_178	-18.0487
coconut	APO	4A	5F32	CNP0194656_1_39	-17.9973
coconut	APO	4A	5F32	CNP0423929_1_66	-17.9241
coconut	APO	4A	5F32	CNP0309085_1_53	-17.7963
coconut	APO	4A	5F32	CNP0423761_1_29	-17.7837
coconut	APO	4A	5F32	CNP0359043_1_132	-17.7751
coconut	APO	4A	5F32	CNP0419544_2_197	-17.7107
coconut	APO	4A	5F32	CNP0289604_1_35	-17.6515
coconut	APO	4A	5F32	CNP0430335_4_182	-17.6416
coconut	APO	4A	5F32	CNP0224904_1_146	-17.6259
coconut	APO	4A	5F32	CNP0321016_1_146	-17.6259
coconut	APO	4A	5F32	CNP0140638_1_37	-17.6205
coconut	APO	4A	5F32	CNP0212631_1_22	-17.5847
coconut	APO	4A	5F32	CNP0308381_1_76	-17.5605
coconut	APO	4A	5F32	CNP0180418_2_82	-17.5531
coconut	APO	4A	5F32	CNP0008172_2_82	-17.5531
coconut	APO	4A	5F32	CNP0273812_1_12	-17.5452
coconut	APO	4A	5F32	CNP0216191_1_116	-17.5422
coconut	APO	4A	5F32	CNP0175997_1_12	-17.5068
coconut	APO	4A	5F32	CNP0180418_1_176	-17.5045
coconut	APO	4A	5F32	CNP0008172_1_176	-17.5045
coconut	APO	4A	5F32	CNP0076373_1_8	-17.4949
coconut	APO	4A	5F32	CNP0245708_1_95	-17.3518
coconut	APO	4A	5F32	CNP0255030_1_108	-17.3442
coconut	APO	4A	5F32	CNP0308282_1_83	-17.3419
coconut	APO	4A	5F32	CNP0215987_1_105	-17.3099
coconut	APO	4A	5F32	CNP0424641_1_28	-17.2819
coconut	APO	4A	5F32	CNP0263196_1_27	-17.2735
coconut	APO	4A	5F32	CNP0136800_1_22	-17.2637
coconut	APO	4A	5F32	CNP0424773_1_29	-17.2289
coconut	APO	4A	5F32	CNP0325514_1_114	-17.2242
coconut	APO	4A	5F32	CNP0178974_1_43	-17.1944
coconut	APO	4A	5F32	CNP0096699_1_12	-17.1793
coconut	APO	4A	5F32	CNP0392944_1_12	-17.1793
coconut	APO	4A	5F32	CNP0302804_1_41	-17.1749
coconut	APO	4A	5F32	CNP0254909_1_30	-17.1569
coconut	APO	4A	5F32	CNP0243560_1_163	-17.1257
coconut	APO	4A	5F32	CNP0295482_1_55	-17.1121
coconut	APO	4A	5F32	CNP0203745_1_78	-17.0946
coconut	APO	4A	5F32	CNP0150581_1_129	-17.0822
coconut	APO	4A	5F32	CNP0277467_1_68	-17.0813
coconut	APO	4A	5F32	CNP0359863_1_143	-17.072
coconut	APO	4A	5F32	CNP0186792_1_117	-17.0688
coconut	APO	4A	5F32	CNP0147359_1_7	-17.0672
coconut	APO	4A	5F32	CNP0417515_1_84	-17.064
coconut	APO	4A	5F32	CNP0310813_1_125	-17.055
coconut	APO	4A	5F32	CNP0435126_1_104	-17.0429
coconut	APO	4A	5F32	CNP0267053_2_96	-17.0307
coconut	APO	4A	5F32	CNP0423476_1_116	-17.0267
coconut	APO	4A	5F32	CNP0262256_1_101	-17.0158
coconut	APO	4A	5F32	CNP0107391_1_185	-17.0072
coconut	APO	4A	5F32	CNP0156423_1_40	-17.0069
coconut	APO	4A	5F32	CNP0272166_1_46	-16.9935
coconut	APO	4A	5F32	CNP0127360_2_11	-16.9894
coconut	APO	4A	5F32	CNP0127360_3_11	-16.9894
coconut	APO	4A	5F32	CNP0127360_1_11	-16.9894
coconut	APO	4A	5F32	CNP0094878_1_81	-16.9851
coconut	APO	4A	5F32	CNP0318626_1_49	-16.9782
coconut	APO	4A	5F32	CNP0161698_1_168	-16.9778
coconut	APO	4A	5F32	CNP0235948_1_177	-16.9728
coconut	APO	4A	5F32	CNP0266887_1_140	-16.9692
coconut	APO	4A	5F32	CNP0324174_1_46	-16.9598
coconut	APO	4A	5F32	CNP0376994_1_18	-16.958
coconut	APO	4A	5F32	CNP0130756_1_124	-16.9532
coconut	APO	4A	5F32	CNP0237115_1_20	-16.9507
coconut	APO	4A	5F32	CNP0104802_1_162	-16.9489
coconut	APO	4A	5F32	CNP0309407_1_51	-16.933
coconut	APO	4A	5F32	CNP0244266_1_18	-16.9309
coconut	APO	4A	5F32	CNP0129631_1_193	-16.9265
coconut	APO	4A	5F32	CNP0177447_1_7	-16.9234
coconut	APO	4A	5F32	CNP0127844_1_123	-16.9209
coconut	APO	4A	5F32	CNP0260658_1_55	-16.9169
coconut	APO	4A	5F32	CNP0209303_1_16	-16.9105
coconut	APO	4A	5F32	CNP0253826_1_70	-16.9066
coconut	APO	4A	5F32	CNP0199675_1_27	-16.9024
coconut	APO	4A	5F32	CNP0122754_1_91	-16.8996
coconut	APO	4A	5F32	CNP0299539_1_154	-16.8989
coconut	APO	4A	5F32	CNP0359693_1_154	-16.8989
coconut	APO	4A	5F32	CNP0346594_1_2	-16.8914
coconut	APO	4A	5F32	CNP0308357_1_28	-16.8894
coconut	APO	4A	5F32	CNP0215373_1_96	-16.8711
coconut	APO	4A	5F32	CNP0002425_1_29	-16.8707
coconut	APO	4A	5F32	CNP0431392_2_113	-16.8586
coconut	APO	4A	5F32	CNP0155839_2_113	-16.8586
coconut	APO	4A	5F32	CNP0154829_1_109	-16.8507
coconut	APO	4A	5F32	CNP0113067_1_185	-16.838
coconut	APO	4A	5F32	CNP0123013_1_68	-16.4017
coconut	APO	4B	4LXL	CNP0308381_1_52	-19.8413
coconut	APO	4B	4LXL	CNP0119105_2_27	-19.8289
coconut	APO	4B	4LXL	CNP0322725_1_148	-19.6062
coconut	APO	4B	4LXL	CNP0220995_1_75	-18.288
coconut	APO	4B	4LXL	CNP0229004_1_66	-18.0722
coconut	APO	4B	4LXL	CNP0137837_1_109	-17.8786
coconut	APO	4B	4LXL	CNP0113067_1_185	-17.7179
coconut	APO	4B	4LXL	CNP0189246_1_189	-17.7172
coconut	APO	4B	4LXL	CNP0154417_1_32	-17.6673
coconut	APO	4B	4LXL	CNP0417515_1_16	-17.6531
coconut	APO	4B	4LXL	CNP0216191_1_116	-17.6384
coconut	APO	4B	4LXL	CNP0283960_1_5	-17.6148
coconut	APO	4B	4LXL	CNP0148320_1_12	-17.5287
coconut	APO	4B	4LXL	CNP0304362_1_103	-17.4912
coconut	APO	4B	4LXL	CNP0262256_1_101	-17.4835
coconut	APO	4B	4LXL	CNP0424178_1_34	-17.4688
coconut	APO	4B	4LXL	CNP0207153_1_12	-17.4121
coconut	APO	4B	4LXL	CNP0423761_1_2	-17.4002
coconut	APO	4B	4LXL	CNP0157068_1_124	-17.355
coconut	APO	4B	4LXL	CNP0180599_1_12	-17.3498
coconut	APO	4B	4LXL	CNP0367137_1_12	-17.3498
coconut	APO	4B	4LXL	CNP0228520_1_60	-17.3482
coconut	APO	4B	4LXL	CNP0267140_1_8	-17.3454
coconut	APO	4B	4LXL	CNP0345317_1_45	-17.3148
coconut	APO	4B	4LXL	CNP0146870_1_12	-17.3052
coconut	APO	4B	4LXL	CNP0319966_1_29	-17.2883
coconut	APO	4B	4LXL	CNP0128114_1_47	-17.2838
coconut	APO	4B	4LXL	CNP0122809_1_42	-17.2424
coconut	APO	4B	4LXL	CNP0359693_1_154	-17.1845
coconut	APO	4B	4LXL	CNP0299539_1_154	-17.1845
coconut	APO	4B	4LXL	CNP0222564_1_24	-17.1746
coconut	APO	4B	4LXL	CNP0435301_3_67	-17.1727
coconut	APO	4B	4LXL	CNP0087950_1_12	-17.1643
coconut	APO	4B	4LXL	CNP0304580_1_14	-17.1345
coconut	APO	4B	4LXL	CNP0285717_1_123	-17.1238
coconut	APO	4B	4LXL	CNP0076179_1_6	-17.1189
coconut	APO	4B	4LXL	CNP0021868_1_111	-17.1137
coconut	APO	4B	4LXL	CNP0435301_1_67	-17.0779
coconut	APO	4B	4LXL	CNP0350256_1_10	-17.0239
coconut	APO	4B	4LXL	CNP0359879_1_58	-17.0221
coconut	APO	4B	4LXL	CNP0316754_1_88	-17.0196
coconut	APO	4B	4LXL	CNP0267053_2_80	-17.0187
coconut	APO	4B	4LXL	CNP0042460_1_189	-17.0015
coconut	APO	4B	4LXL	CNP0242553_1_8	-16.9966
coconut	APO	4B	4LXL	CNP0206814_1_107	-16.9658
coconut	APO	4B	4LXL	CNP0232196_1_107	-16.9658
coconut	APO	4B	4LXL	CNP0317278_1_175	-16.9353
coconut	APO	4B	4LXL	CNP0259668_1_16	-16.928
coconut	APO	4B	4LXL	CNP0132701_2_16	-16.928
coconut	APO	4B	4LXL	CNP0132701_1_16	-16.928
coconut	APO	4B	4LXL	CNP0208686_1_57	-16.9136
coconut	APO	4B	4LXL	CNP0267053_1_75	-16.8911
coconut	APO	4B	4LXL	CNP0203745_1_70	-16.8652
coconut	APO	4B	4LXL	CNP0420965_1_165	-16.8418
coconut	APO	4B	4LXL	CNP0285156_1_21	-16.8314
coconut	APO	4B	4LXL	CNP0394280_1_65	-16.8223
coconut	APO	4B	4LXL	CNP0076179_2_9	-16.8219
coconut	APO	4B	4LXL	CNP0230229_1_105	-16.8102
coconut	APO	4B	4LXL	CNP0399248_1_6	-16.7843
coconut	APO	4B	4LXL	CNP0410456_1_40	-16.7766
coconut	APO	4B	4LXL	CNP0128128_1_69	-16.7669
coconut	APO	4B	4LXL	CNP0359434_1_4	-16.7652
coconut	APO	4B	4LXL	CNP0241055_1_2	-16.7638
coconut	APO	4B	4LXL	CNP0277467_1_47	-16.7251
coconut	APO	4B	4LXL	CNP0405183_1_68	-16.718
coconut	APO	4B	4LXL	CNP0362666_3_94	-16.7152
coconut	APO	4B	4LXL	CNP0350313_3_94	-16.7152
coconut	APO	4B	4LXL	CNP0205554_1_11	-16.7098
coconut	APO	4B	4LXL	CNP0231351_1_199	-16.7022
coconut	APO	4B	4LXL	CNP0041540_1_181	-16.7014
coconut	APO	4B	4LXL	CNP0328884_1_4	-16.679
coconut	APO	4B	4LXL	CNP0242776_1_138	-16.6696
coconut	APO	4B	4LXL	CNP0028918_1_104	-16.667
coconut	APO	4B	4LXL	CNP0428660_2_135	-16.6596
coconut	APO	4B	4LXL	CNP0001909_1_17	-16.6582
coconut	APO	4B	4LXL	CNP0374709_1_115	-16.6487
coconut	APO	4B	4LXL	CNP0272227_1_125	-16.6413
coconut	APO	4B	4LXL	CNP0132004_1_155	-16.6355
coconut	APO	4B	4LXL	CNP0221280_1_30	-16.6326
coconut	APO	4B	4LXL	CNP0091544_1_30	-16.5966
coconut	APO	4B	4LXL	CNP0419623_1_67	-16.593
coconut	APO	4B	4LXL	CNP0174280_1_81	-16.5893
coconut	APO	4B	4LXL	CNP0173762_1_73	-16.5803
coconut	APO	4B	4LXL	CNP0076745_2_116	-16.5727
coconut	APO	4B	4LXL	CNP0076745_4_116	-16.5727
coconut	APO	4B	4LXL	CNP0076745_3_116	-16.5727
coconut	APO	4B	4LXL	CNP0076745_1_116	-16.5727
coconut	APO	4B	4LXL	CNP0079205_1_51	-16.5659
coconut	APO	4B	4LXL	CNP0289604_1_115	-16.5642
coconut	APO	4B	4LXL	CNP0321016_1_146	-16.5553
coconut	APO	4B	4LXL	CNP0224904_1_146	-16.5553
coconut	APO	4B	4LXL	CNP0262776_2_176	-16.5503
coconut	APO	4B	4LXL	CNP0054731_2_176	-16.5503
coconut	APO	4B	4LXL	CNP0211425_1_22	-16.5491
coconut	APO	4B	4LXL	CNP0377439_1_128	-16.543
coconut	APO	4B	4LXL	CNP0328623_1_30	-16.5323
coconut	APO	4B	4LXL	CNP0312981_1_4	-16.5275
coconut	APO	4B	4LXL	CNP0142499_1_85	-16.5097
coconut	APO	4B	4LXL	CNP0311201_1_8	-16.5094
coconut	APO	4B	4LXL	CNP0380039_1_193	-15.9222
coconut	APO	4C	2XML	CNP0229004_1_66	-18.3589
coconut	APO	4C	2XML	CNP0424178_1_14	-18.2402
coconut	APO	4C	2XML	CNP0304362_1_39	-17.6969
coconut	APO	4C	2XML	CNP0423761_1_2	-17.5172
coconut	APO	4C	2XML	CNP0079664_1_126	-17.4083
coconut	APO	4C	2XML	CNP0164312_2_70	-17.3447
coconut	APO	4C	2XML	CNP0295482_1_12	-17.2388
coconut	APO	4C	2XML	CNP0264135_1_88	-17.1441
coconut	APO	4C	2XML	CNP0128114_1_127	-17.1296
coconut	APO	4C	2XML	CNP0235948_1_177	-17.0403
coconut	APO	4C	2XML	CNP0076062_1_78	-16.9855
coconut	APO	4C	2XML	CNP0298095_1_60	-16.8847
coconut	APO	4C	2XML	CNP0042460_1_88	-16.8814
coconut	APO	4C	2XML	CNP0312981_1_4	-16.878
coconut	APO	4C	2XML	CNP0210555_1_91	-16.8678
coconut	APO	4C	2XML	CNP0337399_1_56	-16.8634
coconut	APO	4C	2XML	CNP0106657_1_4	-16.8271
coconut	APO	4C	2XML	CNP0390167_1_125	-16.7271
coconut	APO	4C	2XML	CNP0008172_1_176	-16.7262
coconut	APO	4C	2XML	CNP0180418_1_176	-16.7262
coconut	APO	4C	2XML	CNP0223556_2_168	-16.706
coconut	APO	4C	2XML	CNP0337304_1_52	-16.6827
coconut	APO	4C	2XML	CNP0185235_1_122	-16.6516
coconut	APO	4C	2XML	CNP0273114_1_19	-16.638
coconut	APO	4C	2XML	CNP0289604_1_49	-16.6369
coconut	APO	4C	2XML	CNP0181746_1_63	-16.6353
coconut	APO	4C	2XML	CNP0308381_1_30	-16.6183
coconut	APO	4C	2XML	CNP0132701_2_26	-16.5929
coconut	APO	4C	2XML	CNP0132701_1_26	-16.5929
coconut	APO	4C	2XML	CNP0259668_1_26	-16.5929
coconut	APO	4C	2XML	CNP0220934_1_153	-16.5798
coconut	APO	4C	2XML	CNP0146015_1_132	-16.5756
coconut	APO	4C	2XML	CNP0327529_1_44	-16.5753
coconut	APO	4C	2XML	CNP0308028_1_174	-16.5591
coconut	APO	4C	2XML	CNP0322212_1_98	-16.557
coconut	APO	4C	2XML	CNP0032316_1_180	-16.5494
coconut	APO	4C	2XML	CNP0161034_1_14	-16.5406
coconut	APO	4C	2XML	CNP0049837_1_38	-16.5151
coconut	APO	4C	2XML	CNP0424773_1_63	-16.5029
coconut	APO	4C	2XML	CNP0209303_2_11	-16.4966
coconut	APO	4C	2XML	CNP0059946_3_196	-16.4849
coconut	APO	4C	2XML	CNP0277876_3_196	-16.4849
coconut	APO	4C	2XML	CNP0059946_1_163	-16.4848
coconut	APO	4C	2XML	CNP0277876_1_163	-16.4848
coconut	APO	4C	2XML	CNP0236063_1_137	-16.4801
coconut	APO	4C	2XML	CNP0215373_1_87	-16.4761
coconut	APO	4C	2XML	CNP0107752_1_5	-16.4583
coconut	APO	4C	2XML	CNP0341906_1_2	-16.4451
coconut	APO	4C	2XML	CNP0018314_1_165	-16.4263
coconut	APO	4C	2XML	CNP0210989_1_183	-16.4181
coconut	APO	4C	2XML	CNP0183925_8_1	-16.3928
coconut	APO	4C	2XML	CNP0350587_1_20	-16.381
coconut	APO	4C	2XML	CNP0426536_1_9	-16.355
coconut	APO	4C	2XML	CNP0296073_1_19	-16.3479
coconut	APO	4C	2XML	CNP0094878_1_81	-16.3023
coconut	APO	4C	2XML	CNP0312579_1_63	-16.2797
coconut	APO	4C	2XML	CNP0290027_1_133	-16.2556
coconut	APO	4C	2XML	CNP0359879_1_26	-16.2519
coconut	APO	4C	2XML	CNP0324174_1_46	-16.2419
coconut	APO	4C	2XML	CNP0258703_1_87	-16.2262
coconut	APO	4C	2XML	CNP0208393_1_87	-16.2262
coconut	APO	4C	2XML	CNP0091544_1_45	-16.2228
coconut	APO	4C	2XML	CNP0183925_7_1	-16.2222
coconut	APO	4C	2XML	CNP0222564_1_27	-16.2102
coconut	APO	4C	2XML	CNP0105928_1_9	-16.2087
coconut	APO	4C	2XML	CNP0070170_2_158	-16.1969
coconut	APO	4C	2XML	CNP0070170_3_158	-16.1969
coconut	APO	4C	2XML	CNP0070170_4_158	-16.1969
coconut	APO	4C	2XML	CNP0070170_1_158	-16.1969
coconut	APO	4C	2XML	CNP0076373_1_8	-16.1913
coconut	APO	4C	2XML	CNP0417515_1_42	-16.1907
coconut	APO	4C	2XML	CNP0277876_2_18	-16.1733
coconut	APO	4C	2XML	CNP0059946_2_18	-16.1733
coconut	APO	4C	2XML	CNP0394280_1_56	-16.1729
coconut	APO	4C	2XML	CNP0064191_2_136	-16.1726
coconut	APO	4C	2XML	CNP0346620_1_1	-16.1626
coconut	APO	4C	2XML	CNP0183807_1_120	-16.1573
coconut	APO	4C	2XML	CNP0245708_1_124	-16.1504
coconut	APO	4C	2XML	CNP0133338_1_107	-16.1417
coconut	APO	4C	2XML	CNP0083624_1_59	-16.1347
coconut	APO	4C	2XML	CNP0045257_1_70	-16.1251
coconut	APO	4C	2XML	CNP0109270_1_132	-16.122
coconut	APO	4C	2XML	CNP0180418_2_82	-16.1174
coconut	APO	4C	2XML	CNP0008172_2_82	-16.1174
coconut	APO	4C	2XML	CNP0087950_1_155	-16.113
coconut	APO	4C	2XML	CNP0130573_1_172	-16.1125
coconut	APO	4C	2XML	CNP0156423_2_1	-16.1032
coconut	APO	4C	2XML	CNP0275914_1_197	-16.1025
coconut	APO	4C	2XML	CNP0405183_1_131	-16.0957
coconut	APO	4C	2XML	CNP0419623_1_67	-16.093
coconut	APO	4C	2XML	CNP0309085_1_53	-16.0874
coconut	APO	4C	2XML	CNP0166798_1_134	-16.0857
coconut	APO	4C	2XML	CNP0069299_1_1	-16.0743
coconut	APO	4C	2XML	CNP0121468_2_1	-16.0651
coconut	APO	4C	2XML	CNP0133233_1_92	-16.0487
coconut	APO	4C	2XML	CNP0246507_1_7	-16.0432
coconut	APO	4C	2XML	CNP0235350_1_133	-16.0098
coconut	APO	4C	2XML	CNP0312138_1_79	-16.0034
coconut	APO	4C	2XML	CNP0092234_1_28	-16.001
coconut	APO	4C	2XML	CNP0309407_1_173	-15.6207
coconut	APO	4D	4HON	CNP0229004_1_66	-19.229
coconut	APO	4D	4HON	CNP0128114_1_87	-19.0013
coconut	APO	4D	4HON	CNP0289604_1_115	-18.6625
coconut	APO	4D	4HON	CNP0362352_1_5	-18.6618
coconut	APO	4D	4HON	CNP0302804_1_124	-18.2058
coconut	APO	4D	4HON	CNP0434953_2_2	-17.9197
coconut	APO	4D	4HON	CNP0359434_1_72	-17.8684
coconut	APO	4D	4HON	CNP0216191_1_116	-17.8367
coconut	APO	4D	4HON	CNP0028918_1_73	-17.8337
coconut	APO	4D	4HON	CNP0434953_3_138	-17.7885
coconut	APO	4D	4HON	CNP0203745_1_70	-17.7726
coconut	APO	4D	4HON	CNP0434953_1_2	-17.5611
coconut	APO	4D	4HON	CNP0325960_1_89	-17.543
coconut	APO	4D	4HON	CNP0278027_1_103	-17.4032
coconut	APO	4D	4HON	CNP0144674_1_72	-17.374
coconut	APO	4D	4HON	CNP0430335_2_2	-17.305
coconut	APO	4D	4HON	CNP0076062_1_108	-17.2745
coconut	APO	4D	4HON	CNP0002425_1_16	-17.2503
coconut	APO	4D	4HON	CNP0394280_1_59	-17.215
coconut	APO	4D	4HON	CNP0424178_1_14	-17.1833
coconut	APO	4D	4HON	CNP0430335_3_153	-17.0599
coconut	APO	4D	4HON	CNP0113067_1_185	-16.9895
coconut	APO	4D	4HON	CNP0312579_1_63	-16.9838
coconut	APO	4D	4HON	CNP0294315_1_4	-16.9627
coconut	APO	4D	4HON	CNP0430335_1_194	-16.939
coconut	APO	4D	4HON	CNP0121775_1_127	-16.9142
coconut	APO	4D	4HON	CNP0094298_1_179	-16.8552
coconut	APO	4D	4HON	CNP0230229_1_129	-16.8446
coconut	APO	4D	4HON	CNP0150581_1_138	-16.8341
coconut	APO	4D	4HON	CNP0299539_1_141	-16.8334
coconut	APO	4D	4HON	CNP0359693_1_141	-16.8334
coconut	APO	4D	4HON	CNP0419544_2_197	-16.7556
coconut	APO	4D	4HON	CNP0210555_1_91	-16.7374
coconut	APO	4D	4HON	CNP0152354_1_179	-16.7318
coconut	APO	4D	4HON	CNP0216497_1_169	-16.681
coconut	APO	4D	4HON	CNP0268374_1_190	-16.6788
coconut	APO	4D	4HON	CNP0095897_1_190	-16.6788
coconut	APO	4D	4HON	CNP0294420_1_134	-16.6434
coconut	APO	4D	4HON	CNP0318626_1_73	-16.6287
coconut	APO	4D	4HON	CNP0397301_1_61	-16.607
coconut	APO	4D	4HON	CNP0197577_1_61	-16.607
coconut	APO	4D	4HON	CNP0155799_1_36	-16.6037
coconut	APO	4D	4HON	CNP0102781_1_62	-16.5955
coconut	APO	4D	4HON	CNP0434953_4_25	-16.5745
coconut	APO	4D	4HON	CNP0314509_1_11	-16.5628
coconut	APO	4D	4HON	CNP0181746_1_31	-16.5541
coconut	APO	4D	4HON	CNP0105928_1_83	-16.5442
coconut	APO	4D	4HON	CNP0195977_1_130	-16.5384
coconut	APO	4D	4HON	CNP0238696_1_107	-16.5363
coconut	APO	4D	4HON	CNP0399248_1_51	-16.5078
coconut	APO	4D	4HON	CNP0309407_1_118	-16.4955
coconut	APO	4D	4HON	CNP0424977_1_59	-16.4874
coconut	APO	4D	4HON	CNP0031860_1_169	-16.4718
coconut	APO	4D	4HON	CNP0215987_1_95	-16.4573
coconut	APO	4D	4HON	CNP0374951_1_79	-16.4507
coconut	APO	4D	4HON	CNP0092871_2_35	-16.4253
coconut	APO	4D	4HON	CNP0051008_2_35	-16.4253
coconut	APO	4D	4HON	CNP0410456_1_40	-16.4152
coconut	APO	4D	4HON	CNP0295482_1_143	-16.407
coconut	APO	4D	4HON	CNP0348631_1_94	-16.3934
coconut	APO	4D	4HON	CNP0129618_1_94	-16.3934
coconut	APO	4D	4HON	CNP0250614_1_28	-16.3907
coconut	APO	4D	4HON	CNP0126958_1_149	-16.3794
coconut	APO	4D	4HON	CNP0267053_2_105	-16.3647
coconut	APO	4D	4HON	CNP0172822_1_168	-16.3581
coconut	APO	4D	4HON	CNP0266887_1_41	-16.3518
coconut	APO	4D	4HON	CNP0419623_1_67	-16.3359
coconut	APO	4D	4HON	CNP0119105_2_28	-16.3335
coconut	APO	4D	4HON	CNP0285138_1_18	-16.3304
coconut	APO	4D	4HON	CNP0401882_1_50	-16.3118
coconut	APO	4D	4HON	CNP0317472_1_125	-16.2965
coconut	APO	4D	4HON	CNP0198676_1_185	-16.2634
coconut	APO	4D	4HON	CNP0262228_1_5	-16.2483
coconut	APO	4D	4HON	CNP0207153_1_104	-16.2424
coconut	APO	4D	4HON	CNP0279652_2_175	-16.2293
coconut	APO	4D	4HON	CNP0432824_3_93	-16.2237
coconut	APO	4D	4HON	CNP0359459_1_103	-16.2148
coconut	APO	4D	4HON	CNP0243580_1_41	-16.2136
coconut	APO	4D	4HON	CNP0424641_1_104	-16.2107
coconut	APO	4D	4HON	CNP0212631_1_6	-16.2105
coconut	APO	4D	4HON	CNP0161034_1_197	-16.2085
coconut	APO	4D	4HON	CNP0128128_1_6	-16.1996
coconut	APO	4D	4HON	CNP0011475_1_115	-16.1949
coconut	APO	4D	4HON	CNP0344247_1_71	-16.167
coconut	APO	4D	4HON	CNP0280303_1_59	-16.1598
coconut	APO	4D	4HON	CNP0308381_1_56	-16.1542
coconut	APO	4D	4HON	CNP0038082_1_13	-16.1339
coconut	APO	4D	4HON	CNP0424602_1_13	-16.1339
coconut	APO	4D	4HON	CNP0402996_1_6	-16.1266
coconut	APO	4D	4HON	CNP0107752_1_96	-16.1258
coconut	APO	4D	4HON	CNP0081446_1_69	-16.0832
coconut	APO	4D	4HON	CNP0041810_1_81	-16.0735
coconut	APO	4D	4HON	CNP0200027_1_44	-16.0585
coconut	APO	4D	4HON	CNP0002873_1_13	-16.057
coconut	APO	4D	4HON	CNP0178668_1_84	-16.0506
coconut	APO	4D	4HON	CNP0052972_1_18	-16.0491
coconut	APO	4D	4HON	CNP0106199_1_111	-16.0444
coconut	APO	4D	4HON	CNP0097294_1_111	-16.0444
coconut	APO	4D	4HON	CNP0327529_1_44	-16.0342
coconut	APO	4D	4HON	CNP0171944_1_23	-15.6784
coconut	APO	4D	4HOO	CNP0289604_1_43	-19.8065
coconut	APO	4D	4HOO	CNP0128114_1_6	-19.2949
coconut	APO	4D	4HOO	CNP0076062_1_108	-19.0634
coconut	APO	4D	4HOO	CNP0028918_1_73	-18.6112
coconut	APO	4D	4HOO	CNP0229004_1_72	-18.5777
coconut	APO	4D	4HOO	CNP0083716_1_137	-18.4404
coconut	APO	4D	4HOO	CNP0312579_1_127	-18.3516
coconut	APO	4D	4HOO	CNP0278027_1_72	-18.3205
coconut	APO	4D	4HOO	CNP0302804_1_29	-18.299
coconut	APO	4D	4HOO	CNP0362352_1_5	-18.1776
coconut	APO	4D	4HOO	CNP0309407_1_130	-18.1365
coconut	APO	4D	4HOO	CNP0430335_3_151	-18.1233
coconut	APO	4D	4HOO	CNP0002873_1_13	-18.1099
coconut	APO	4D	4HOO	CNP0338225_1_25	-18.0976
coconut	APO	4D	4HOO	CNP0130611_1_5	-18.0106
coconut	APO	4D	4HOO	CNP0230036_1_5	-18.0106
coconut	APO	4D	4HOO	CNP0080740_1_16	-18.0033
coconut	APO	4D	4HOO	CNP0430335_4_63	-17.9255
coconut	APO	4D	4HOO	CNP0434953_2_2	-17.8738
coconut	APO	4D	4HOO	CNP0243580_1_40	-17.8726
coconut	APO	4D	4HOO	CNP0308381_1_10	-17.8705
coconut	APO	4D	4HOO	CNP0164524_1_170	-17.8257
coconut	APO	4D	4HOO	CNP0104938_1_70	-17.7763
coconut	APO	4D	4HOO	CNP0155799_1_36	-17.7688
coconut	APO	4D	4HOO	CNP0424178_1_105	-17.7411
coconut	APO	4D	4HOO	CNP0139956_1_13	-17.7239
coconut	APO	4D	4HOO	CNP0216191_1_37	-17.6564
coconut	APO	4D	4HOO	CNP0291984_1_111	-17.5912
coconut	APO	4D	4HOO	CNP0248483_1_48	-17.5895
coconut	APO	4D	4HOO	CNP0042460_1_105	-17.5544
coconut	APO	4D	4HOO	CNP0424602_1_84	-17.5476
coconut	APO	4D	4HOO	CNP0038082_1_84	-17.5476
coconut	APO	4D	4HOO	CNP0132798_1_183	-17.5281
coconut	APO	4D	4HOO	CNP0244266_1_5	-17.4442
coconut	APO	4D	4HOO	CNP0155219_1_178	-17.4385
coconut	APO	4D	4HOO	CNP0002425_1_16	-17.3948
coconut	APO	4D	4HOO	CNP0316371_1_186	-17.3863
coconut	APO	4D	4HOO	CNP0113067_1_11	-17.3591
coconut	APO	4D	4HOO	CNP0216497_1_107	-17.3343
coconut	APO	4D	4HOO	CNP0434953_3_57	-17.3301
coconut	APO	4D	4HOO	CNP0228520_1_60	-17.3247
coconut	APO	4D	4HOO	CNP0308282_1_40	-17.3141
coconut	APO	4D	4HOO	CNP0430335_2_43	-17.3104
coconut	APO	4D	4HOO	CNP0026079_1_119	-17.2869
coconut	APO	4D	4HOO	CNP0405122_1_119	-17.2869
coconut	APO	4D	4HOO	CNP0200027_1_8	-17.2827
coconut	APO	4D	4HOO	CNP0434953_1_2	-17.2781
coconut	APO	4D	4HOO	CNP0212631_1_5	-17.2619
coconut	APO	4D	4HOO	CNP0154510_1_62	-17.2537
coconut	APO	4D	4HOO	CNP0332730_1_12	-17.2518
coconut	APO	4D	4HOO	CNP0394280_1_59	-17.2401
coconut	APO	4D	4HOO	CNP0434953_4_66	-17.2364
coconut	APO	4D	4HOO	CNP0116370_1_9	-17.2259
coconut	APO	4D	4HOO	CNP0285515_1_58	-17.1931
coconut	APO	4D	4HOO	CNP0272434_1_13	-17.1922
coconut	APO	4D	4HOO	CNP0179823_1_11	-17.1825
coconut	APO	4D	4HOO	CNP0387675_1_106	-17.1685
coconut	APO	4D	4HOO	CNP0262256_1_101	-17.1573
coconut	APO	4D	4HOO	CNP0419623_1_67	-17.1465
coconut	APO	4D	4HOO	CNP0346620_1_95	-17.1399
coconut	APO	4D	4HOO	CNP0304580_1_97	-17.1237
coconut	APO	4D	4HOO	CNP0089063_1_169	-17.123
coconut	APO	4D	4HOO	CNP0359693_1_141	-17.1038
coconut	APO	4D	4HOO	CNP0299539_1_141	-17.1038
coconut	APO	4D	4HOO	CNP0215987_1_129	-17.0634
coconut	APO	4D	4HOO	CNP0279652_1_107	-17.0418
coconut	APO	4D	4HOO	CNP0087950_1_155	-17.037
coconut	APO	4D	4HOO	CNP0032316_1_49	-17.0136
coconut	APO	4D	4HOO	CNP0383187_1_14	-17.0086
coconut	APO	4D	4HOO	CNP0279652_2_58	-17.0044
coconut	APO	4D	4HOO	CNP0374951_1_79	-16.9887
coconut	APO	4D	4HOO	CNP0423761_1_75	-16.9797
coconut	APO	4D	4HOO	CNP0148933_1_174	-16.9797
coconut	APO	4D	4HOO	CNP0337304_1_15	-16.9711
coconut	APO	4D	4HOO	CNP0294420_1_24	-16.9562
coconut	APO	4D	4HOO	CNP0424641_1_134	-16.9379
coconut	APO	4D	4HOO	CNP0121775_1_90	-16.9316
coconut	APO	4D	4HOO	CNP0144674_1_72	-16.926
coconut	APO	4D	4HOO	CNP0203745_1_70	-16.9034
coconut	APO	4D	4HOO	CNP0274322_1_195	-16.8997
coconut	APO	4D	4HOO	CNP0060355_1_25	-16.8916
coconut	APO	4D	4HOO	CNP0041810_1_81	-16.8914
coconut	APO	4D	4HOO	CNP0119105_2_27	-16.876
coconut	APO	4D	4HOO	CNP0183809_1_151	-16.8741
coconut	APO	4D	4HOO	CNP0294315_1_4	-16.863
coconut	APO	4D	4HOO	CNP0128128_1_6	-16.8599
coconut	APO	4D	4HOO	CNP0319048_1_138	-16.8536
coconut	APO	4D	4HOO	CNP0076373_1_8	-16.8348
coconut	APO	4D	4HOO	CNP0230229_1_105	-16.8292
coconut	APO	4D	4HOO	CNP0189246_1_189	-16.8262
coconut	APO	4D	4HOO	CNP0164502_1_27	-16.8205
coconut	APO	4D	4HOO	CNP0348631_1_130	-16.8189
coconut	APO	4D	4HOO	CNP0129618_1_130	-16.8189
coconut	APO	4D	4HOO	CNP0127668_1_143	-16.8155
coconut	APO	4D	4HOO	CNP0135050_1_62	-16.8009
coconut	APO	4D	4HOO	CNP0092871_2_35	-16.7919
coconut	APO	4D	4HOO	CNP0051008_2_35	-16.7919
coconut	APO	4D	4HOO	CNP0207153_1_103	-16.7631
coconut	APO	4D	4HOO	CNP0133338_1_107	-16.7523
coconut	APO	4D	4HOO	CNP0104662_1_34	-16.088
coconut	APO	4D	5F5C	CNP0421857_1_118	-17.3219
coconut	APO	4D	5F5C	CNP0337304_1_12	-17.2917
coconut	APO	4D	5F5C	CNP0080749_1_182	-17.2325
coconut	APO	4D	5F5C	CNP0210602_1_13	-17.1654
coconut	APO	4D	5F5C	CNP0319747_1_45	-17.0928
coconut	APO	4D	5F5C	CNP0209303_2_11	-17.0851
coconut	APO	4D	5F5C	CNP0228520_1_194	-17.0462
coconut	APO	4D	5F5C	CNP0210555_1_91	-16.9911
coconut	APO	4D	5F5C	CNP0417515_1_42	-16.9807
coconut	APO	4D	5F5C	CNP0252678_1_163	-16.8309
coconut	APO	4D	5F5C	CNP0195977_1_130	-16.721
coconut	APO	4D	5F5C	CNP0118054_1_79	-16.7084
coconut	APO	4D	5F5C	CNP0332596_1_108	-16.6977
coconut	APO	4D	5F5C	CNP0249364_1_33	-16.6575
coconut	APO	4D	5F5C	CNP0302437_1_111	-16.6502
coconut	APO	4D	5F5C	CNP0273495_1_40	-16.6455
coconut	APO	4D	5F5C	CNP0278204_1_35	-16.5945
coconut	APO	4D	5F5C	CNP0180516_1_22	-16.5514
coconut	APO	4D	5F5C	CNP0265773_1_10	-16.5077
coconut	APO	4D	5F5C	CNP0165898_1_107	-16.5075
coconut	APO	4D	5F5C	CNP0201377_1_102	-16.4976
coconut	APO	4D	5F5C	CNP0279539_1_165	-16.4498
coconut	APO	4D	5F5C	CNP0299916_1_86	-16.442
coconut	APO	4D	5F5C	CNP0148082_1_175	-16.4353
coconut	APO	4D	5F5C	CNP0093729_1_11	-16.4105
coconut	APO	4D	5F5C	CNP0192697_1_147	-16.3861
coconut	APO	4D	5F5C	CNP0076062_1_78	-16.3736
coconut	APO	4D	5F5C	CNP0327529_1_44	-16.3331
coconut	APO	4D	5F5C	CNP0258703_1_24	-16.3317
coconut	APO	4D	5F5C	CNP0208393_1_24	-16.3317
coconut	APO	4D	5F5C	CNP0180702_1_184	-16.3254
coconut	APO	4D	5F5C	CNP0050259_1_47	-16.3244
coconut	APO	4D	5F5C	CNP0400870_1_14	-16.3213
coconut	APO	4D	5F5C	CNP0031287_1_92	-16.3159
coconut	APO	4D	5F5C	CNP0128506_1_161	-16.2983
coconut	APO	4D	5F5C	CNP0153886_1_36	-16.2973
coconut	APO	4D	5F5C	CNP0139450_1_136	-16.2809
coconut	APO	4D	5F5C	CNP0352577_1_63	-16.2789
coconut	APO	4D	5F5C	CNP0289656_1_21	-16.276
coconut	APO	4D	5F5C	CNP0239991_12_113	-16.2705
coconut	APO	4D	5F5C	CNP0239991_5_124	-16.2675
coconut	APO	4D	5F5C	CNP0273114_1_49	-16.254
coconut	APO	4D	5F5C	CNP0079664_1_126	-16.2449
coconut	APO	4D	5F5C	CNP0289604_1_88	-16.2167
coconut	APO	4D	5F5C	CNP0278959_1_12	-16.2165
coconut	APO	4D	5F5C	CNP0162890_1_42	-16.2133
coconut	APO	4D	5F5C	CNP0216191_1_116	-16.1853
coconut	APO	4D	5F5C	CNP0203745_1_23	-16.1848
coconut	APO	4D	5F5C	CNP0333917_1_73	-16.1662
coconut	APO	4D	5F5C	CNP0075032_1_73	-16.1662
coconut	APO	4D	5F5C	CNP0135360_1_33	-16.1635
coconut	APO	4D	5F5C	CNP0278892_1_19	-16.154
coconut	APO	4D	5F5C	CNP0308688_1_50	-16.131
coconut	APO	4D	5F5C	CNP0262370_1_128	-16.1066
coconut	APO	4D	5F5C	CNP0143053_1_23	-16.0964
coconut	APO	4D	5F5C	CNP0125956_1_91	-16.0811
coconut	APO	4D	5F5C	CNP0335145_1_91	-16.0811
coconut	APO	4D	5F5C	CNP0131787_1_68	-16.0809
coconut	APO	4D	5F5C	CNP0344609_1_9	-16.0612
coconut	APO	4D	5F5C	CNP0415460_1_160	-16.0587
coconut	APO	4D	5F5C	CNP0133233_1_24	-16.0536
coconut	APO	4D	5F5C	CNP0300062_1_113	-16.0118
coconut	APO	4D	5F5C	CNP0075166_1_87	-16.0019
coconut	APO	4D	5F5C	CNP0197577_1_61	-15.9984
coconut	APO	4D	5F5C	CNP0397301_1_61	-15.9984
coconut	APO	4D	5F5C	CNP0259668_1_44	-15.991
coconut	APO	4D	5F5C	CNP0132701_1_44	-15.991
coconut	APO	4D	5F5C	CNP0132701_2_44	-15.991
coconut	APO	4D	5F5C	CNP0110137_1_94	-15.9903
coconut	APO	4D	5F5C	CNP0362666_3_169	-15.989
coconut	APO	4D	5F5C	CNP0350313_3_169	-15.989
coconut	APO	4D	5F5C	CNP0144674_1_72	-15.9862
coconut	APO	4D	5F5C	CNP0317472_1_98	-15.9748
coconut	APO	4D	5F5C	CNP0229004_1_144	-15.9608
coconut	APO	4D	5F5C	CNP0329165_1_140	-15.9484
coconut	APO	4D	5F5C	CNP0171860_1_169	-15.9177
coconut	APO	4D	5F5C	CNP0247951_1_200	-15.889
coconut	APO	4D	5F5C	CNP0104802_1_48	-15.8872
coconut	APO	4D	5F5C	CNP0155487_1_71	-15.8865
coconut	APO	4D	5F5C	CNP0185764_1_85	-15.8846
coconut	APO	4D	5F5C	CNP0133338_1_107	-15.8659
coconut	APO	4D	5F5C	CNP0372492_2_57	-15.8571
coconut	APO	4D	5F5C	CNP0115371_1_20	-15.8447
coconut	APO	4D	5F5C	CNP0189246_1_50	-15.8312
coconut	APO	4D	5F5C	CNP0277799_1_36	-15.8252
coconut	APO	4D	5F5C	CNP0227298_1_134	-15.8245
coconut	APO	4D	5F5C	CNP0175250_1_55	-15.822
coconut	APO	4D	5F5C	CNP0172334_1_190	-15.8217
coconut	APO	4D	5F5C	CNP0374670_1_61	-15.8022
coconut	APO	4D	5F5C	CNP0120055_1_180	-15.7999
coconut	APO	4D	5F5C	CNP0350313_1_124	-15.7992
coconut	APO	4D	5F5C	CNP0362666_1_124	-15.7992
coconut	APO	4D	5F5C	CNP0239991_1_102	-15.7962
coconut	APO	4D	5F5C	CNP0239991_3_102	-15.7956
coconut	APO	4D	5F5C	CNP0117340_1_156	-15.7952
coconut	APO	4D	5F5C	CNP0239991_11_111	-15.7944
coconut	APO	4D	5F5C	CNP0174688_1_14	-15.7873
coconut	APO	4D	5F5C	CNP0116556_1_11	-15.7514
coconut	APO	4D	5F5C	CNP0155799_1_6	-15.7241
coconut	APO	4D	5F5C	CNP0158391_1_111	-15.2806
coconut	APO	4D	5FP4	CNP0229004_1_66	-18.6099
coconut	APO	4D	5FP4	CNP0128114_1_67	-18.6029
coconut	APO	4D	5FP4	CNP0044880_1_70	-17.6893
coconut	APO	4D	5FP4	CNP0289604_1_94	-17.3881
coconut	APO	4D	5FP4	CNP0312579_1_115	-17.1066
coconut	APO	4D	5FP4	CNP0195857_1_9	-16.9397
coconut	APO	4D	5FP4	CNP0028918_1_97	-16.8821
coconut	APO	4D	5FP4	CNP0045283_1_110	-16.8161
coconut	APO	4D	5FP4	CNP0308381_1_33	-16.7972
coconut	APO	4D	5FP4	CNP0079664_1_126	-16.7943
coconut	APO	4D	5FP4	CNP0424178_1_14	-16.7201
coconut	APO	4D	5FP4	CNP0209303_2_11	-16.711
coconut	APO	4D	5FP4	CNP0076062_1_78	-16.6785
coconut	APO	4D	5FP4	CNP0250614_1_28	-16.6088
coconut	APO	4D	5FP4	CNP0266887_1_102	-16.539
coconut	APO	4D	5FP4	CNP0309257_1_18	-16.5164
coconut	APO	4D	5FP4	CNP0417515_1_42	-16.5037
coconut	APO	4D	5FP4	CNP0156804_1_15	-16.4006
coconut	APO	4D	5FP4	CNP0161034_1_197	-16.3865
coconut	APO	4D	5FP4	CNP0278027_1_116	-16.3823
coconut	APO	4D	5FP4	CNP0230229_1_102	-16.3819
coconut	APO	4D	5FP4	CNP0294420_1_186	-16.3597
coconut	APO	4D	5FP4	CNP0245708_1_124	-16.3464
coconut	APO	4D	5FP4	CNP0299564_1_151	-16.3094
coconut	APO	4D	5FP4	CNP0312138_1_79	-16.2857
coconut	APO	4D	5FP4	CNP0372492_2_57	-16.2454
coconut	APO	4D	5FP4	CNP0191417_1_61	-16.2344
coconut	APO	4D	5FP4	CNP0331731_1_189	-16.2304
coconut	APO	4D	5FP4	CNP0350313_2_167	-16.2195
coconut	APO	4D	5FP4	CNP0362666_2_167	-16.2195
coconut	APO	4D	5FP4	CNP0125423_1_53	-16.1015
coconut	APO	4D	5FP4	CNP0252678_1_163	-16.0982
coconut	APO	4D	5FP4	CNP0296262_1_79	-16.0386
coconut	APO	4D	5FP4	CNP0119840_1_166	-16.0311
coconut	APO	4D	5FP4	CNP0350313_1_102	-15.9752
coconut	APO	4D	5FP4	CNP0362666_1_102	-15.9752
coconut	APO	4D	5FP4	CNP0350313_3_141	-15.9751
coconut	APO	4D	5FP4	CNP0362666_3_141	-15.9751
coconut	APO	4D	5FP4	CNP0188642_1_109	-15.97
coconut	APO	4D	5FP4	CNP0434734_1_172	-15.9628
coconut	APO	4D	5FP4	CNP0151329_1_137	-15.9619
coconut	APO	4D	5FP4	CNP0308688_1_99	-15.8934
coconut	APO	4D	5FP4	CNP0246507_1_46	-15.8853
coconut	APO	4D	5FP4	CNP0292447_2_181	-15.8621
coconut	APO	4D	5FP4	CNP0091802_1_64	-15.8575
coconut	APO	4D	5FP4	CNP0079205_1_114	-15.8299
coconut	APO	4D	5FP4	CNP0325960_1_89	-15.8044
coconut	APO	4D	5FP4	CNP0278892_1_8	-15.7977
coconut	APO	4D	5FP4	CNP0162890_1_42	-15.7706
coconut	APO	4D	5FP4	CNP0400870_1_14	-15.7689
coconut	APO	4D	5FP4	CNP0337304_1_12	-15.7681
coconut	APO	4D	5FP4	CNP0063328_1_110	-15.7477
coconut	APO	4D	5FP4	CNP0104802_1_53	-15.7258
coconut	APO	4D	5FP4	CNP0372492_1_57	-15.7233
coconut	APO	4D	5FP4	CNP0252731_1_182	-15.7219
coconut	APO	4D	5FP4	CNP0302804_1_124	-15.7071
coconut	APO	4D	5FP4	CNP0192174_1_19	-15.6723
coconut	APO	4D	5FP4	CNP0212631_1_40	-15.6451
coconut	APO	4D	5FP4	CNP0316375_1_27	-15.6396
coconut	APO	4D	5FP4	CNP0137334_1_27	-15.6396
coconut	APO	4D	5FP4	CNP0149863_1_2	-15.6392
coconut	APO	4D	5FP4	CNP0052972_1_14	-15.59
coconut	APO	4D	5FP4	CNP0249364_1_33	-15.5889
coconut	APO	4D	5FP4	CNP0299916_1_95	-15.5833
coconut	APO	4D	5FP4	CNP0309407_1_111	-15.5821
coconut	APO	4D	5FP4	CNP0330413_1_40	-15.5613
coconut	APO	4D	5FP4	CNP0355532_1_39	-15.5547
coconut	APO	4D	5FP4	CNP0144674_1_72	-15.5138
coconut	APO	4D	5FP4	CNP0061399_1_11	-15.5061
coconut	APO	4D	5FP4	CNP0368457_1_11	-15.5061
coconut	APO	4D	5FP4	CNP0174688_1_32	-15.4912
coconut	APO	4D	5FP4	CNP0303294_1_156	-15.4886
coconut	APO	4D	5FP4	CNP0221243_1_9	-15.4856
coconut	APO	4D	5FP4	CNP0215987_1_129	-15.434
coconut	APO	4D	5FP4	CNP0162296_1_52	-15.4165
coconut	APO	4D	5FP4	CNP0309457_1_2	-15.4089
coconut	APO	4D	5FP4	CNP0083256_2_152	-15.4008
coconut	APO	4D	5FP4	CNP0245426_1_171	-15.3903
coconut	APO	4D	5FP4	CNP0202274_1_89	-15.3896
coconut	APO	4D	5FP4	CNP0388925_1_6	-15.3787
coconut	APO	4D	5FP4	CNP0132991_1_53	-15.3753
coconut	APO	4D	5FP4	CNP0200027_1_68	-15.3619
coconut	APO	4D	5FP4	CNP0204916_1_4	-15.3485
coconut	APO	4D	5FP4	CNP0161698_1_123	-15.3472
coconut	APO	4D	5FP4	CNP0148933_1_67	-15.3466
coconut	APO	4D	5FP4	CNP0242582_1_71	-15.3446
coconut	APO	4D	5FP4	CNP0153886_1_55	-15.338
coconut	APO	4D	5FP4	CNP0121775_1_106	-15.3365
coconut	APO	4D	5FP4	CNP0179823_1_11	-15.335
coconut	APO	4D	5FP4	CNP0164312_1_54	-15.3337
coconut	APO	4D	5FP4	CNP0200671_1_27	-15.3217
coconut	APO	4D	5FP4	CNP0324370_1_184	-15.3159
coconut	APO	4D	5FP4	CNP0421857_1_77	-15.3117
coconut	APO	4D	5FP4	CNP0202676_1_186	-15.3097
coconut	APO	4D	5FP4	CNP0317472_1_123	-15.3061
coconut	APO	4D	5FP4	CNP0137354_1_3	-15.3019
coconut	APO	4D	5FP4	CNP0164136_1_88	-15.3
coconut	APO	4D	5FP4	CNP0294315_1_4	-15.2976
coconut	APO	4D	5FP4	CNP0246725_1_141	-15.2905
coconut	APO	4D	5FP4	CNP0130718_1_17	-14.8028
coconut	APO	4D	5FP7	CNP0229004_1_66	-18.6099
coconut	APO	4D	5FP7	CNP0128114_1_67	-18.6029
coconut	APO	4D	5FP7	CNP0044880_1_70	-17.6893
coconut	APO	4D	5FP7	CNP0289604_1_94	-17.3881
coconut	APO	4D	5FP7	CNP0312579_1_115	-17.1066
coconut	APO	4D	5FP7	CNP0195857_1_9	-16.9397
coconut	APO	4D	5FP7	CNP0028918_1_97	-16.8821
coconut	APO	4D	5FP7	CNP0045283_1_110	-16.8161
coconut	APO	4D	5FP7	CNP0308381_1_33	-16.7972
coconut	APO	4D	5FP7	CNP0079664_1_126	-16.7943
coconut	APO	4D	5FP7	CNP0424178_1_14	-16.7201
coconut	APO	4D	5FP7	CNP0209303_2_11	-16.711
coconut	APO	4D	5FP7	CNP0076062_1_78	-16.6785
coconut	APO	4D	5FP7	CNP0250614_1_28	-16.6088
coconut	APO	4D	5FP7	CNP0266887_1_102	-16.539
coconut	APO	4D	5FP7	CNP0309257_1_18	-16.5164
coconut	APO	4D	5FP7	CNP0417515_1_42	-16.5037
coconut	APO	4D	5FP7	CNP0156804_1_15	-16.4006
coconut	APO	4D	5FP7	CNP0161034_1_197	-16.3865
coconut	APO	4D	5FP7	CNP0278027_1_116	-16.3823
coconut	APO	4D	5FP7	CNP0230229_1_102	-16.3819
coconut	APO	4D	5FP7	CNP0294420_1_186	-16.3597
coconut	APO	4D	5FP7	CNP0245708_1_124	-16.3464
coconut	APO	4D	5FP7	CNP0299564_1_151	-16.3094
coconut	APO	4D	5FP7	CNP0312138_1_79	-16.2857
coconut	APO	4D	5FP7	CNP0372492_2_57	-16.2454
coconut	APO	4D	5FP7	CNP0191417_1_61	-16.2344
coconut	APO	4D	5FP7	CNP0331731_1_189	-16.2304
coconut	APO	4D	5FP7	CNP0362666_2_167	-16.2195
coconut	APO	4D	5FP7	CNP0350313_2_167	-16.2195
coconut	APO	4D	5FP7	CNP0125423_1_53	-16.1015
coconut	APO	4D	5FP7	CNP0252678_1_163	-16.0982
coconut	APO	4D	5FP7	CNP0296262_1_79	-16.0386
coconut	APO	4D	5FP7	CNP0119840_1_166	-16.0311
coconut	APO	4D	5FP7	CNP0362666_1_102	-15.9752
coconut	APO	4D	5FP7	CNP0350313_1_102	-15.9752
coconut	APO	4D	5FP7	CNP0350313_3_141	-15.9751
coconut	APO	4D	5FP7	CNP0362666_3_141	-15.9751
coconut	APO	4D	5FP7	CNP0188642_1_109	-15.97
coconut	APO	4D	5FP7	CNP0434734_1_172	-15.9628
coconut	APO	4D	5FP7	CNP0151329_1_137	-15.9619
coconut	APO	4D	5FP7	CNP0308688_1_99	-15.8934
coconut	APO	4D	5FP7	CNP0246507_1_46	-15.8853
coconut	APO	4D	5FP7	CNP0292447_2_181	-15.8621
coconut	APO	4D	5FP7	CNP0091802_1_64	-15.8575
coconut	APO	4D	5FP7	CNP0079205_1_114	-15.8299
coconut	APO	4D	5FP7	CNP0325960_1_89	-15.8044
coconut	APO	4D	5FP7	CNP0278892_1_8	-15.7977
coconut	APO	4D	5FP7	CNP0162890_1_42	-15.7706
coconut	APO	4D	5FP7	CNP0400870_1_14	-15.7689
coconut	APO	4D	5FP7	CNP0337304_1_12	-15.7681
coconut	APO	4D	5FP7	CNP0063328_1_110	-15.7477
coconut	APO	4D	5FP7	CNP0104802_1_53	-15.7258
coconut	APO	4D	5FP7	CNP0372492_1_57	-15.7233
coconut	APO	4D	5FP7	CNP0252731_1_182	-15.7219
coconut	APO	4D	5FP7	CNP0302804_1_124	-15.7071
coconut	APO	4D	5FP7	CNP0192174_1_19	-15.6723
coconut	APO	4D	5FP7	CNP0212631_1_40	-15.6451
coconut	APO	4D	5FP7	CNP0316375_1_27	-15.6396
coconut	APO	4D	5FP7	CNP0137334_1_27	-15.6396
coconut	APO	4D	5FP7	CNP0149863_1_2	-15.6392
coconut	APO	4D	5FP7	CNP0052972_1_14	-15.59
coconut	APO	4D	5FP7	CNP0249364_1_33	-15.5889
coconut	APO	4D	5FP7	CNP0299916_1_95	-15.5833
coconut	APO	4D	5FP7	CNP0309407_1_111	-15.5821
coconut	APO	4D	5FP7	CNP0330413_1_40	-15.5613
coconut	APO	4D	5FP7	CNP0355532_1_39	-15.5547
coconut	APO	4D	5FP7	CNP0144674_1_72	-15.5138
coconut	APO	4D	5FP7	CNP0368457_1_11	-15.5061
coconut	APO	4D	5FP7	CNP0061399_1_11	-15.5061
coconut	APO	4D	5FP7	CNP0174688_1_32	-15.4912
coconut	APO	4D	5FP7	CNP0303294_1_156	-15.4886
coconut	APO	4D	5FP7	CNP0221243_1_9	-15.4856
coconut	APO	4D	5FP7	CNP0215987_1_129	-15.434
coconut	APO	4D	5FP7	CNP0162296_1_52	-15.4165
coconut	APO	4D	5FP7	CNP0309457_1_2	-15.4089
coconut	APO	4D	5FP7	CNP0083256_2_152	-15.4008
coconut	APO	4D	5FP7	CNP0245426_1_171	-15.3903
coconut	APO	4D	5FP7	CNP0202274_1_89	-15.3896
coconut	APO	4D	5FP7	CNP0388925_1_6	-15.3787
coconut	APO	4D	5FP7	CNP0132991_1_53	-15.3753
coconut	APO	4D	5FP7	CNP0200027_1_68	-15.3619
coconut	APO	4D	5FP7	CNP0204916_1_4	-15.3485
coconut	APO	4D	5FP7	CNP0161698_1_123	-15.3472
coconut	APO	4D	5FP7	CNP0148933_1_67	-15.3466
coconut	APO	4D	5FP7	CNP0242582_1_71	-15.3446
coconut	APO	4D	5FP7	CNP0153886_1_55	-15.338
coconut	APO	4D	5FP7	CNP0121775_1_106	-15.3365
coconut	APO	4D	5FP7	CNP0179823_1_11	-15.335
coconut	APO	4D	5FP7	CNP0164312_1_54	-15.3337
coconut	APO	4D	5FP7	CNP0200671_1_27	-15.3217
coconut	APO	4D	5FP7	CNP0324370_1_184	-15.3159
coconut	APO	4D	5FP7	CNP0421857_1_77	-15.3117
coconut	APO	4D	5FP7	CNP0202676_1_186	-15.3097
coconut	APO	4D	5FP7	CNP0317472_1_123	-15.3061
coconut	APO	4D	5FP7	CNP0137354_1_3	-15.3019
coconut	APO	4D	5FP7	CNP0164136_1_88	-15.3
coconut	APO	4D	5FP7	CNP0294315_1_4	-15.2976
coconut	APO	4D	5FP7	CNP0246725_1_141	-15.2905
coconut	APO	4D	5FP7	CNP0130718_1_17	-14.8028
coconut	APO	4D	5FP8	CNP0229004_1_66	-19.8536
coconut	APO	4D	5FP8	CNP0299564_1_77	-18.3287
coconut	APO	4D	5FP8	CNP0028918_1_73	-18.1578
coconut	APO	4D	5FP8	CNP0424178_1_14	-18.1292
coconut	APO	4D	5FP8	CNP0289604_1_94	-18.0523
coconut	APO	4D	5FP8	CNP0252678_1_163	-17.9161
coconut	APO	4D	5FP8	CNP0312579_1_156	-17.8642
coconut	APO	4D	5FP8	CNP0128114_1_148	-17.7317
coconut	APO	4D	5FP8	CNP0044880_1_70	-17.508
coconut	APO	4D	5FP8	CNP0294315_1_4	-17.4922
coconut	APO	4D	5FP8	CNP0325960_1_89	-17.4684
coconut	APO	4D	5FP8	CNP0045283_1_110	-17.4201
coconut	APO	4D	5FP8	CNP0358459_1_95	-17.3783
coconut	APO	4D	5FP8	CNP0278027_1_194	-17.348
coconut	APO	4D	5FP8	CNP0266887_1_140	-17.3429
coconut	APO	4D	5FP8	CNP0174688_1_32	-17.3405
coconut	APO	4D	5FP8	CNP0195857_1_9	-17.3202
coconut	APO	4D	5FP8	CNP0337304_1_12	-17.1973
coconut	APO	4D	5FP8	CNP0076062_1_78	-17.1843
coconut	APO	4D	5FP8	CNP0417515_1_42	-17.1778
coconut	APO	4D	5FP8	CNP0215987_1_129	-17.0517
coconut	APO	4D	5FP8	CNP0079664_1_126	-17.0106
coconut	APO	4D	5FP8	CNP0230229_1_105	-16.9457
coconut	APO	4D	5FP8	CNP0092234_1_16	-16.8949
coconut	APO	4D	5FP8	CNP0331731_1_119	-16.8909
coconut	APO	4D	5FP8	CNP0312138_1_79	-16.8049
coconut	APO	4D	5FP8	CNP0209303_2_11	-16.804
coconut	APO	4D	5FP8	CNP0397301_1_61	-16.7928
coconut	APO	4D	5FP8	CNP0197577_1_61	-16.7928
coconut	APO	4D	5FP8	CNP0309407_1_131	-16.7894
coconut	APO	4D	5FP8	CNP0295482_1_12	-16.7868
coconut	APO	4D	5FP8	CNP0246507_1_115	-16.7826
coconut	APO	4D	5FP8	CNP0302804_1_124	-16.7686
coconut	APO	4D	5FP8	CNP0245708_1_124	-16.7581
coconut	APO	4D	5FP8	CNP0144674_1_72	-16.7192
coconut	APO	4D	5FP8	CNP0132798_1_65	-16.6966
coconut	APO	4D	5FP8	CNP0262256_1_79	-16.6791
coconut	APO	4D	5FP8	CNP0162890_1_42	-16.6766
coconut	APO	4D	5FP8	CNP0308381_1_76	-16.6709
coconut	APO	4D	5FP8	CNP0311295_1_6	-16.6577
coconut	APO	4D	5FP8	CNP0091544_1_75	-16.6558
coconut	APO	4D	5FP8	CNP0241055_1_27	-16.6535
coconut	APO	4D	5FP8	CNP0394280_1_59	-16.6003
coconut	APO	4D	5FP8	CNP0308688_1_50	-16.5667
coconut	APO	4D	5FP8	CNP0208686_1_57	-16.5409
coconut	APO	4D	5FP8	CNP0235948_1_143	-16.5165
coconut	APO	4D	5FP8	CNP0372492_2_57	-16.5143
coconut	APO	4D	5FP8	CNP0410456_1_40	-16.4836
coconut	APO	4D	5FP8	CNP0267053_2_80	-16.4662
coconut	APO	4D	5FP8	CNP0362666_3_141	-16.4547
coconut	APO	4D	5FP8	CNP0350313_3_141	-16.4547
coconut	APO	4D	5FP8	CNP0210555_1_91	-16.4542
coconut	APO	4D	5FP8	CNP0278892_1_19	-16.4437
coconut	APO	4D	5FP8	CNP0030363_2_182	-16.4326
coconut	APO	4D	5FP8	CNP0254486_2_182	-16.4326
coconut	APO	4D	5FP8	CNP0148933_1_67	-16.4115
coconut	APO	4D	5FP8	CNP0309085_1_53	-16.3924
coconut	APO	4D	5FP8	CNP0087950_1_186	-16.388
coconut	APO	4D	5FP8	CNP0240322_1_9	-16.383
coconut	APO	4D	5FP8	CNP0228520_1_60	-16.3817
coconut	APO	4D	5FP8	CNP0259668_1_44	-16.3779
coconut	APO	4D	5FP8	CNP0132701_1_44	-16.3779
coconut	APO	4D	5FP8	CNP0132701_2_44	-16.3779
coconut	APO	4D	5FP8	CNP0230774_1_30	-16.3615
coconut	APO	4D	5FP8	CNP0106448_1_30	-16.3615
coconut	APO	4D	5FP8	CNP0137837_1_76	-16.3586
coconut	APO	4D	5FP8	CNP0276127_1_70	-16.3576
coconut	APO	4D	5FP8	CNP0344247_1_71	-16.3516
coconut	APO	4D	5FP8	CNP0359459_1_103	-16.3471
coconut	APO	4D	5FP8	CNP0299916_1_95	-16.3379
coconut	APO	4D	5FP8	CNP0279652_2_191	-16.3292
coconut	APO	4D	5FP8	CNP0180418_2_196	-16.3252
coconut	APO	4D	5FP8	CNP0008172_2_196	-16.3252
coconut	APO	4D	5FP8	CNP0174280_1_123	-16.2964
coconut	APO	4D	5FP8	CNP0316375_1_20	-16.2889
coconut	APO	4D	5FP8	CNP0137334_1_20	-16.2889
coconut	APO	4D	5FP8	CNP0161034_1_182	-16.2802
coconut	APO	4D	5FP8	CNP0359340_1_2	-16.2797
coconut	APO	4D	5FP8	CNP0150581_1_138	-16.2785
coconut	APO	4D	5FP8	CNP0278959_1_27	-16.2636
coconut	APO	4D	5FP8	CNP0063328_1_110	-16.2624
coconut	APO	4D	5FP8	CNP0169711_1_98	-16.2503
coconut	APO	4D	5FP8	CNP0306797_1_63	-16.2483
coconut	APO	4D	5FP8	CNP0299539_1_93	-16.2416
coconut	APO	4D	5FP8	CNP0359693_1_93	-16.2416
coconut	APO	4D	5FP8	CNP0259904_1_80	-16.2358
coconut	APO	4D	5FP8	CNP0042460_1_88	-16.2309
coconut	APO	4D	5FP8	CNP0350313_1_102	-16.2227
coconut	APO	4D	5FP8	CNP0362666_1_102	-16.2227
coconut	APO	4D	5FP8	CNP0369352_1_38	-16.2162
coconut	APO	4D	5FP8	CNP0277812_1_7	-16.2149
coconut	APO	4D	5FP8	CNP0372492_1_57	-16.2123
coconut	APO	4D	5FP8	CNP0423761_1_48	-16.2095
coconut	APO	4D	5FP8	CNP0279652_1_164	-16.2063
coconut	APO	4D	5FP8	CNP0115371_1_20	-16.2051
coconut	APO	4D	5FP8	CNP0288133_1_144	-16.2004
coconut	APO	4D	5FP8	CNP0362352_1_5	-16.1922
coconut	APO	4D	5FP8	CNP0277876_3_196	-16.1913
coconut	APO	4D	5FP8	CNP0059946_3_196	-16.1913
coconut	APO	4D	5FP8	CNP0254484_1_100	-15.8009
coconut	APO	4D	5FPA	CNP0229004_1_66	-19.1594
coconut	APO	4D	5FPA	CNP0209303_2_11	-18.0618
coconut	APO	4D	5FPA	CNP0424178_1_14	-17.9881
coconut	APO	4D	5FPA	CNP0128114_1_67	-17.6338
coconut	APO	4D	5FPA	CNP0079664_1_126	-17.5458
coconut	APO	4D	5FPA	CNP0289604_1_94	-17.5273
coconut	APO	4D	5FPA	CNP0278892_1_19	-17.2693
coconut	APO	4D	5FPA	CNP0417515_1_42	-17.0824
coconut	APO	4D	5FPA	CNP0076062_1_78	-16.9608
coconut	APO	4D	5FPA	CNP0308381_1_33	-16.9416
coconut	APO	4D	5FPA	CNP0192174_1_20	-16.8897
coconut	APO	4D	5FPA	CNP0215987_1_129	-16.8541
coconut	APO	4D	5FPA	CNP0162890_1_42	-16.8206
coconut	APO	4D	5FPA	CNP0309407_1_131	-16.7761
coconut	APO	4D	5FPA	CNP0306797_1_63	-16.7426
coconut	APO	4D	5FPA	CNP0266887_1_101	-16.6693
coconut	APO	4D	5FPA	CNP0028918_1_73	-16.6655
coconut	APO	4D	5FPA	CNP0337304_1_12	-16.6645
coconut	APO	4D	5FPA	CNP0312579_1_156	-16.6639
coconut	APO	4D	5FPA	CNP0210555_1_91	-16.5718
coconut	APO	4D	5FPA	CNP0362352_1_5	-16.5307
coconut	APO	4D	5FPA	CNP0259668_1_44	-16.4915
coconut	APO	4D	5FPA	CNP0132701_2_44	-16.4915
coconut	APO	4D	5FPA	CNP0132701_1_44	-16.4915
coconut	APO	4D	5FPA	CNP0252678_1_163	-16.4474
coconut	APO	4D	5FPA	CNP0325960_1_30	-16.4315
coconut	APO	4D	5FPA	CNP0195857_1_9	-16.4094
coconut	APO	4D	5FPA	CNP0331731_1_143	-16.409
coconut	APO	4D	5FPA	CNP0144674_1_72	-16.4
coconut	APO	4D	5FPA	CNP0313303_1_25	-16.3821
coconut	APO	4D	5FPA	CNP0294315_1_4	-16.3798
coconut	APO	4D	5FPA	CNP0397301_1_61	-16.3742
coconut	APO	4D	5FPA	CNP0197577_1_61	-16.3742
coconut	APO	4D	5FPA	CNP0063328_1_110	-16.3596
coconut	APO	4D	5FPA	CNP0288133_1_181	-16.3144
coconut	APO	4D	5FPA	CNP0421857_1_174	-16.2755
coconut	APO	4D	5FPA	CNP0245426_1_171	-16.2375
coconut	APO	4D	5FPA	CNP0161034_1_197	-16.2029
coconut	APO	4D	5FPA	CNP0148933_1_67	-16.1695
coconut	APO	4D	5FPA	CNP0245708_1_124	-16.149
coconut	APO	4D	5FPA	CNP0203745_1_70	-16.1395
coconut	APO	4D	5FPA	CNP0174280_1_123	-16.1204
coconut	APO	4D	5FPA	CNP0299564_1_77	-16.1184
coconut	APO	4D	5FPA	CNP0359879_1_38	-16.1013
coconut	APO	4D	5FPA	CNP0249364_1_33	-16.0905
coconut	APO	4D	5FPA	CNP0234513_1_191	-16.0776
coconut	APO	4D	5FPA	CNP0115371_1_20	-16.0678
coconut	APO	4D	5FPA	CNP0327529_1_44	-16.0676
coconut	APO	4D	5FPA	CNP0125423_1_53	-16.058
coconut	APO	4D	5FPA	CNP0228520_1_194	-16.0481
coconut	APO	4D	5FPA	CNP0265773_1_84	-16.0237
coconut	APO	4D	5FPA	CNP0208686_1_57	-16.0156
coconut	APO	4D	5FPA	CNP0240322_1_9	-16.0143
coconut	APO	4D	5FPA	CNP0045283_1_110	-15.9909
coconut	APO	4D	5FPA	CNP0044880_1_70	-15.9758
coconut	APO	4D	5FPA	CNP0144325_1_37	-15.9572
coconut	APO	4D	5FPA	CNP0254484_1_100	-15.942
coconut	APO	4D	5FPA	CNP0080749_1_182	-15.9392
coconut	APO	4D	5FPA	CNP0241055_1_2	-15.9374
coconut	APO	4D	5FPA	CNP0278959_1_27	-15.9125
coconut	APO	4D	5FPA	CNP0358459_1_79	-15.9011
coconut	APO	4D	5FPA	CNP0308688_1_50	-15.8869
coconut	APO	4D	5FPA	CNP0195977_1_130	-15.8861
coconut	APO	4D	5FPA	CNP0021868_1_151	-15.8824
coconut	APO	4D	5FPA	CNP0220617_1_6	-15.8788
coconut	APO	4D	5FPA	CNP0278027_1_116	-15.8506
coconut	APO	4D	5FPA	CNP0294420_1_186	-15.8434
coconut	APO	4D	5FPA	CNP0286826_1_98	-15.8384
coconut	APO	4D	5FPA	CNP0394280_1_59	-15.8373
coconut	APO	4D	5FPA	CNP0283530_1_16	-15.8314
coconut	APO	4D	5FPA	CNP0410456_1_40	-15.8157
coconut	APO	4D	5FPA	CNP0400870_1_14	-15.809
coconut	APO	4D	5FPA	CNP0200394_1_181	-15.8073
coconut	APO	4D	5FPA	CNP0232196_1_32	-15.799
coconut	APO	4D	5FPA	CNP0206814_1_32	-15.799
coconut	APO	4D	5FPA	CNP0242776_1_130	-15.7983
coconut	APO	4D	5FPA	CNP0287359_1_118	-15.7682
coconut	APO	4D	5FPA	CNP0418450_1_68	-15.757
coconut	APO	4D	5FPA	CNP0121775_1_105	-15.7387
coconut	APO	4D	5FPA	CNP0227679_1_65	-15.7334
coconut	APO	4D	5FPA	CNP0419623_1_67	-15.7196
coconut	APO	4D	5FPA	CNP0230229_1_105	-15.7079
coconut	APO	4D	5FPA	CNP0372492_2_57	-15.7007
coconut	APO	4D	5FPA	CNP0191417_1_26	-15.6915
coconut	APO	4D	5FPA	CNP0361705_1_6	-15.6853
coconut	APO	4D	5FPA	CNP0083256_2_141	-15.6784
coconut	APO	4D	5FPA	CNP0200027_1_101	-15.6736
coconut	APO	4D	5FPA	CNP0198090_1_24	-15.6731
coconut	APO	4D	5FPA	CNP0092234_1_73	-15.6704
coconut	APO	4D	5FPA	CNP0302804_1_124	-15.6667
coconut	APO	4D	5FPA	CNP0258703_1_87	-15.6664
coconut	APO	4D	5FPA	CNP0208393_1_87	-15.6664
coconut	APO	4D	5FPA	CNP0299916_1_95	-15.6649
coconut	APO	4D	5FPA	CNP0230774_1_30	-15.6647
coconut	APO	4D	5FPA	CNP0106448_1_30	-15.6647
coconut	APO	4D	5FPA	CNP0360006_1_51	-15.6635
coconut	APO	4D	5FPA	CNP0118054_1_156	-15.6493
coconut	APO	4D	5FPA	CNP0388925_1_6	-15.6433
coconut	APO	4D	5FPA	CNP0293525_1_153	-15.6286
coconut	APO	4D	5FPA	CNP0314956_1_18	-15.0955
coconut	APO	4D	5FPB	CNP0319348_1_10	-18.6286
coconut	APO	4D	5FPB	CNP0321536_1_65	-18.0521
coconut	APO	4D	5FPB	CNP0128114_1_127	-17.7629
coconut	APO	4D	5FPB	CNP0312579_1_160	-16.8068
coconut	APO	4D	5FPB	CNP0309085_1_53	-16.7918
coconut	APO	4D	5FPB	CNP0269790_1_81	-16.7663
coconut	APO	4D	5FPB	CNP0202676_1_98	-16.6541
coconut	APO	4D	5FPB	CNP0096576_2_5	-16.3441
coconut	APO	4D	5FPB	CNP0096576_1_5	-16.3073
coconut	APO	4D	5FPB	CNP0308088_2_64	-16.2632
coconut	APO	4D	5FPB	CNP0212631_1_54	-16.2589
coconut	APO	4D	5FPB	CNP0103956_1_7	-16.099
coconut	APO	4D	5FPB	CNP0079205_1_19	-16.0358
coconut	APO	4D	5FPB	CNP0216497_1_32	-16.0224
coconut	APO	4D	5FPB	CNP0241673_1_84	-16.005
coconut	APO	4D	5FPB	CNP0021865_1_186	-15.9691
coconut	APO	4D	5FPB	CNP0170134_1_199	-15.826
coconut	APO	4D	5FPB	CNP0435990_3_44	-15.8189
coconut	APO	4D	5FPB	CNP0435990_4_44	-15.8189
coconut	APO	4D	5FPB	CNP0435990_2_44	-15.8189
coconut	APO	4D	5FPB	CNP0206487_1_10	-15.7448
coconut	APO	4D	5FPB	CNP0276563_4_85	-15.7014
coconut	APO	4D	5FPB	CNP0276563_2_85	-15.7014
coconut	APO	4D	5FPB	CNP0276563_3_85	-15.7014
coconut	APO	4D	5FPB	CNP0079794_4_61	-15.6837
coconut	APO	4D	5FPB	CNP0079794_2_61	-15.6837
coconut	APO	4D	5FPB	CNP0074696_4_61	-15.6837
coconut	APO	4D	5FPB	CNP0074696_3_61	-15.6837
coconut	APO	4D	5FPB	CNP0074696_2_61	-15.6837
coconut	APO	4D	5FPB	CNP0079794_3_61	-15.6837
coconut	APO	4D	5FPB	CNP0064808_1_74	-15.6511
coconut	APO	4D	5FPB	CNP0238392_1_110	-15.6026
coconut	APO	4D	5FPB	CNP0268094_3_21	-15.6023
coconut	APO	4D	5FPB	CNP0268094_2_21	-15.6023
coconut	APO	4D	5FPB	CNP0102501_2_128	-15.5807
coconut	APO	4D	5FPB	CNP0227679_1_65	-15.5756
coconut	APO	4D	5FPB	CNP0074505_4_33	-15.5742
coconut	APO	4D	5FPB	CNP0074505_2_33	-15.5742
coconut	APO	4D	5FPB	CNP0074505_3_33	-15.5742
coconut	APO	4D	5FPB	CNP0021860_1_184	-15.52
coconut	APO	4D	5FPB	CNP0215987_1_95	-15.4895
coconut	APO	4D	5FPB	CNP0308088_1_124	-15.4675
coconut	APO	4D	5FPB	CNP0299564_1_77	-15.4626
coconut	APO	4D	5FPB	CNP0203036_1_3	-15.4262
coconut	APO	4D	5FPB	CNP0302804_1_125	-15.413
coconut	APO	4D	5FPB	CNP0248361_1_140	-15.3803
coconut	APO	4D	5FPB	CNP0307888_1_130	-15.3779
coconut	APO	4D	5FPB	CNP0200027_1_105	-15.3762
coconut	APO	4D	5FPB	CNP0060668_1_105	-15.3739
coconut	APO	4D	5FPB	CNP0152130_1_105	-15.3739
coconut	APO	4D	5FPB	CNP0293525_1_64	-15.3632
coconut	APO	4D	5FPB	CNP0175192_1_5	-15.3527
coconut	APO	4D	5FPB	CNP0074699_3_26	-15.3325
coconut	APO	4D	5FPB	CNP0335007_4_26	-15.3325
coconut	APO	4D	5FPB	CNP0335007_3_26	-15.3325
coconut	APO	4D	5FPB	CNP0074699_2_26	-15.3325
coconut	APO	4D	5FPB	CNP0074699_4_26	-15.3325
coconut	APO	4D	5FPB	CNP0335007_2_26	-15.3325
coconut	APO	4D	5FPB	CNP0433705_1_141	-15.3274
coconut	APO	4D	5FPB	CNP0303350_1_185	-15.3156
coconut	APO	4D	5FPB	CNP0169798_1_11	-15.3093
coconut	APO	4D	5FPB	CNP0404330_1_11	-15.3024
coconut	APO	4D	5FPB	CNP0373196_1_110	-15.2727
coconut	APO	4D	5FPB	CNP0406424_2_152	-15.2532
coconut	APO	4D	5FPB	CNP0399443_1_38	-15.2422
coconut	APO	4D	5FPB	CNP0309407_1_1	-15.2307
coconut	APO	4D	5FPB	CNP0234324_1_17	-15.2207
coconut	APO	4D	5FPB	CNP0244266_1_54	-15.2201
coconut	APO	4D	5FPB	CNP0147445_1_44	-15.21
coconut	APO	4D	5FPB	CNP0387675_1_106	-15.1781
coconut	APO	4D	5FPB	CNP0396586_1_158	-15.1773
coconut	APO	4D	5FPB	CNP0148933_1_84	-15.166
coconut	APO	4D	5FPB	CNP0003608_1_22	-15.1567
coconut	APO	4D	5FPB	CNP0189585_1_54	-15.1218
coconut	APO	4D	5FPB	CNP0278027_1_120	-15.1006
coconut	APO	4D	5FPB	CNP0238392_2_93	-15.0482
coconut	APO	4D	5FPB	CNP0435301_2_60	-15.0384
coconut	APO	4D	5FPB	CNP0153126_1_80	-15.0338
coconut	APO	4D	5FPB	CNP0385458_1_81	-15.0248
coconut	APO	4D	5FPB	CNP0271703_1_3	-15.0202
coconut	APO	4D	5FPB	CNP0230229_1_102	-15.016
coconut	APO	4D	5FPB	CNP0189356_1_76	-15.0044
coconut	APO	4D	5FPB	CNP0238392_4_124	-14.9755
coconut	APO	4D	5FPB	CNP0281616_1_7	-14.9531
coconut	APO	4D	5FPB	CNP0083256_2_25	-14.9384
coconut	APO	4D	5FPB	CNP0071177_3_86	-14.9382
coconut	APO	4D	5FPB	CNP0071177_2_86	-14.9382
coconut	APO	4D	5FPB	CNP0364286_1_67	-14.9336
coconut	APO	4D	5FPB	CNP0162002_1_118	-14.9311
coconut	APO	4D	5FPB	CNP0199722_3_130	-14.931
coconut	APO	4D	5FPB	CNP0139942_1_49	-14.9271
coconut	APO	4D	5FPB	CNP0199722_1_130	-14.9242
coconut	APO	4D	5FPB	CNP0239991_7_147	-14.8996
coconut	APO	4D	5FPB	CNP0308490_1_168	-14.8931
coconut	APO	4D	5FPB	CNP0239991_5_143	-14.8921
coconut	APO	4D	5FPB	CNP0239940_1_67	-14.8909
coconut	APO	4D	5FPB	CNP0239991_12_132	-14.8892
coconut	APO	4D	5FPB	CNP0249455_1_67	-14.8853
coconut	APO	4D	5FPB	CNP0149863_1_2	-14.883
coconut	APO	4D	5FPB	CNP0264434_2_99	-14.2791
coconut	APO	4D	6H10	CNP0308381_1_33	-17.9145
coconut	APO	4D	6H10	CNP0076062_1_17	-17.3651
coconut	APO	4D	6H10	CNP0060355_1_7	-17.3551
coconut	APO	4D	6H10	CNP0128114_1_67	-16.9434
coconut	APO	4D	6H10	CNP0137837_1_32	-16.8628
coconut	APO	4D	6H10	CNP0285156_1_62	-16.7914
coconut	APO	4D	6H10	CNP0079205_1_19	-16.7839
coconut	APO	4D	6H10	CNP0426536_1_8	-16.7818
coconut	APO	4D	6H10	CNP0135360_1_33	-16.6017
coconut	APO	4D	6H10	CNP0193869_1_102	-16.5736
coconut	APO	4D	6H10	CNP0387675_1_106	-16.4967
coconut	APO	4D	6H10	CNP0285398_1_116	-16.4653
coconut	APO	4D	6H10	CNP0278027_1_120	-16.3374
coconut	APO	4D	6H10	CNP0312579_1_115	-16.2539
coconut	APO	4D	6H10	CNP0359821_1_6	-16.1961
coconut	APO	4D	6H10	CNP0005460_1_48	-16.1621
coconut	APO	4D	6H10	CNP0230229_1_105	-16.1454
coconut	APO	4D	6H10	CNP0435301_2_42	-16.1308
coconut	APO	4D	6H10	CNP0430335_2_143	-16.1168
coconut	APO	4D	6H10	CNP0119105_2_170	-16.0855
coconut	APO	4D	6H10	CNP0358459_1_161	-16.0813
coconut	APO	4D	6H10	CNP0328636_1_47	-16.0679
coconut	APO	4D	6H10	CNP0210555_1_91	-16.013
coconut	APO	4D	6H10	CNP0272227_1_145	-16.0127
coconut	APO	4D	6H10	CNP0001372_1_133	-15.9922
coconut	APO	4D	6H10	CNP0100377_1_7	-15.9677
coconut	APO	4D	6H10	CNP0252678_1_163	-15.9442
coconut	APO	4D	6H10	CNP0177073_1_64	-15.8869
coconut	APO	4D	6H10	CNP0250614_1_28	-15.8728
coconut	APO	4D	6H10	CNP0080992_1_2	-15.855
coconut	APO	4D	6H10	CNP0001909_1_33	-15.8548
coconut	APO	4D	6H10	CNP0189585_1_67	-15.8533
coconut	APO	4D	6H10	CNP0417515_1_42	-15.8479
coconut	APO	4D	6H10	CNP0210041_1_6	-15.8273
coconut	APO	4D	6H10	CNP0319348_1_106	-15.784
coconut	APO	4D	6H10	CNP0289604_1_34	-15.764
coconut	APO	4D	6H10	CNP0042460_1_15	-15.7483
coconut	APO	4D	6H10	CNP0295245_1_131	-15.7461
coconut	APO	4D	6H10	CNP0028918_1_43	-15.7329
coconut	APO	4D	6H10	CNP0249364_1_33	-15.7281
coconut	APO	4D	6H10	CNP0111127_1_21	-15.7259
coconut	APO	4D	6H10	CNP0200027_1_44	-15.7101
coconut	APO	4D	6H10	CNP0435301_1_182	-15.6835
coconut	APO	4D	6H10	CNP0337304_1_33	-15.6814
coconut	APO	4D	6H10	CNP0123391_1_80	-15.6779
coconut	APO	4D	6H10	CNP0246507_1_83	-15.6767
coconut	APO	4D	6H10	CNP0434953_4_8	-15.6753
coconut	APO	4D	6H10	CNP0345317_1_45	-15.6605
coconut	APO	4D	6H10	CNP0244983_2_55	-15.6398
coconut	APO	4D	6H10	CNP0091544_1_18	-15.6372
coconut	APO	4D	6H10	CNP0133338_1_107	-15.6291
coconut	APO	4D	6H10	CNP0028009_1_145	-15.6195
coconut	APO	4D	6H10	CNP0245708_1_71	-15.619
coconut	APO	4D	6H10	CNP0302804_1_14	-15.6128
coconut	APO	4D	6H10	CNP0213182_1_115	-15.6115
coconut	APO	4D	6H10	CNP0119041_1_79	-15.608
coconut	APO	4D	6H10	CNP0002716_1_101	-15.6008
coconut	APO	4D	6H10	CNP0345297_1_7	-15.5791
coconut	APO	4D	6H10	CNP0200993_1_26	-15.5702
coconut	APO	4D	6H10	CNP0434953_2_153	-15.5605
coconut	APO	4D	6H10	CNP0428660_2_135	-15.5478
coconut	APO	4D	6H10	CNP0131543_2_196	-15.5347
coconut	APO	4D	6H10	CNP0423729_1_47	-15.5053
coconut	APO	4D	6H10	CNP0244983_1_15	-15.4632
coconut	APO	4D	6H10	CNP0216028_1_51	-15.4582
coconut	APO	4D	6H10	CNP0122754_1_49	-15.4477
coconut	APO	4D	6H10	CNP0129472_1_128	-15.4365
coconut	APO	4D	6H10	CNP0435301_3_182	-15.4246
coconut	APO	4D	6H10	CNP0187015_1_122	-15.4217
coconut	APO	4D	6H10	CNP0143178_1_199	-15.4162
coconut	APO	4D	6H10	CNP0328623_1_113	-15.4139
coconut	APO	4D	6H10	CNP0047017_1_12	-15.3846
coconut	APO	4D	6H10	CNP0246414_1_103	-15.3528
coconut	APO	4D	6H10	CNP0277467_1_57	-15.3465
coconut	APO	4D	6H10	CNP0435301_4_42	-15.3249
coconut	APO	4D	6H10	CNP0389368_1_11	-15.317
coconut	APO	4D	6H10	CNP0414653_1_74	-15.2988
coconut	APO	4D	6H10	CNP0211002_1_54	-15.2921
coconut	APO	4D	6H10	CNP0102138_1_54	-15.2921
coconut	APO	4D	6H10	CNP0092234_1_5	-15.2869
coconut	APO	4D	6H10	CNP0176226_1_89	-15.2854
coconut	APO	4D	6H10	CNP0405183_1_91	-15.285
coconut	APO	4D	6H10	CNP0319966_1_29	-15.2746
coconut	APO	4D	6H10	CNP0344247_1_13	-15.2533
coconut	APO	4D	6H10	CNP0221002_1_135	-15.2446
coconut	APO	4D	6H10	CNP0162002_1_118	-15.2324
coconut	APO	4D	6H10	CNP0264135_1_185	-15.2253
coconut	APO	4D	6H10	CNP0360006_1_34	-15.2175
coconut	APO	4D	6H10	CNP0260439_1_131	-15.2093
coconut	APO	4D	6H10	CNP0423971_1_76	-15.2053
coconut	APO	4D	6H10	CNP0123391_2_143	-15.2011
coconut	APO	4D	6H10	CNP0274931_1_75	-15.2
coconut	APO	4D	6H10	CNP0347284_1_123	-15.1977
coconut	APO	4D	6H10	CNP0005294_1_156	-15.1954
coconut	APO	4D	6H10	CNP0192697_1_44	-15.187
coconut	APO	4D	6H10	CNP0359434_1_10	-15.1845
coconut	APO	4D	6H10	CNP0351557_1_135	-15.1756
coconut	APO	4D	6H10	CNP0176355_1_8	-15.1755
coconut	APO	4D	6H10	CNP0121775_1_127	-15.1671
coconut	APO	4D	6H10	CNP0388972_1_58	-14.6488
coconut	APO	4E	2W2I	CNP0125603_1_120	-17.7323
coconut	APO	4E	2W2I	CNP0084028_1_34	-17.6202
coconut	APO	4E	2W2I	CNP0433705_1_10	-17.4806
coconut	APO	4E	2W2I	CNP0433705_2_10	-17.4133
coconut	APO	4E	2W2I	CNP0131606_1_13	-17.3469
coconut	APO	4E	2W2I	CNP0084028_2_38	-17.3469
coconut	APO	4E	2W2I	CNP0186792_1_174	-16.8759
coconut	APO	4E	2W2I	CNP0396586_1_158	-16.8415
coconut	APO	4E	2W2I	CNP0239940_2_36	-16.822
coconut	APO	4E	2W2I	CNP0216308_1_36	-16.7856
coconut	APO	4E	2W2I	CNP0175192_1_5	-16.7048
coconut	APO	4E	2W2I	CNP0234324_1_3	-16.6926
coconut	APO	4E	2W2I	CNP0181746_1_63	-16.6891
coconut	APO	4E	2W2I	CNP0269262_1_28	-16.666
coconut	APO	4E	2W2I	CNP0249455_1_67	-16.6161
coconut	APO	4E	2W2I	CNP0312579_1_160	-16.5859
coconut	APO	4E	2W2I	CNP0410458_1_35	-16.4344
coconut	APO	4E	2W2I	CNP0262776_2_176	-16.4052
coconut	APO	4E	2W2I	CNP0054731_2_176	-16.4052
coconut	APO	4E	2W2I	CNP0208068_1_19	-16.4006
coconut	APO	4E	2W2I	CNP0257247_1_82	-16.3928
coconut	APO	4E	2W2I	CNP0076956_1_82	-16.3928
coconut	APO	4E	2W2I	CNP0083479_1_82	-16.3928
coconut	APO	4E	2W2I	CNP0273188_1_2	-16.3476
coconut	APO	4E	2W2I	CNP0079794_4_8	-16.3345
coconut	APO	4E	2W2I	CNP0079794_3_8	-16.3345
coconut	APO	4E	2W2I	CNP0079794_2_8	-16.3345
coconut	APO	4E	2W2I	CNP0074696_2_8	-16.3345
coconut	APO	4E	2W2I	CNP0074696_3_8	-16.3345
coconut	APO	4E	2W2I	CNP0074696_4_8	-16.3345
coconut	APO	4E	2W2I	CNP0045380_1_24	-16.3258
coconut	APO	4E	2W2I	CNP0343691_1_24	-16.3258
coconut	APO	4E	2W2I	CNP0303990_1_40	-16.3142
coconut	APO	4E	2W2I	CNP0137334_1_2	-16.2554
coconut	APO	4E	2W2I	CNP0316375_1_2	-16.2554
coconut	APO	4E	2W2I	CNP0276852_1_70	-16.2484
coconut	APO	4E	2W2I	CNP0148614_1_13	-16.2445
coconut	APO	4E	2W2I	CNP0195802_2_9	-16.1911
coconut	APO	4E	2W2I	CNP0023105_1_31	-16.1753
coconut	APO	4E	2W2I	CNP0266128_1_31	-16.1753
coconut	APO	4E	2W2I	CNP0387675_1_106	-16.17
coconut	APO	4E	2W2I	CNP0326677_1_95	-16.1048
coconut	APO	4E	2W2I	CNP0208068_2_12	-16.0599
coconut	APO	4E	2W2I	CNP0238392_1_166	-16.0543
coconut	APO	4E	2W2I	CNP0239940_1_60	-16.039
coconut	APO	4E	2W2I	CNP0216313_1_45	-16.0334
coconut	APO	4E	2W2I	CNP0236218_1_45	-16.0334
coconut	APO	4E	2W2I	CNP0265913_1_98	-16.0279
coconut	APO	4E	2W2I	CNP0178865_1_37	-16.0219
coconut	APO	4E	2W2I	CNP0259234_1_2	-16.0201
coconut	APO	4E	2W2I	CNP0182800_3_67	-16.0112
coconut	APO	4E	2W2I	CNP0043891_3_67	-16.0112
coconut	APO	4E	2W2I	CNP0406424_2_152	-16.0008
coconut	APO	4E	2W2I	CNP0156516_1_104	-15.9931
coconut	APO	4E	2W2I	CNP0302804_1_41	-15.9811
coconut	APO	4E	2W2I	CNP0317472_1_53	-15.9671
coconut	APO	4E	2W2I	CNP0060668_2_167	-15.9538
coconut	APO	4E	2W2I	CNP0152130_2_167	-15.9538
coconut	APO	4E	2W2I	CNP0280941_1_184	-15.9425
coconut	APO	4E	2W2I	CNP0253604_1_16	-15.916
coconut	APO	4E	2W2I	CNP0276852_2_77	-15.8718
coconut	APO	4E	2W2I	CNP0278027_1_140	-15.8702
coconut	APO	4E	2W2I	CNP0404657_1_84	-15.8611
coconut	APO	4E	2W2I	CNP0368756_1_101	-15.8367
coconut	APO	4E	2W2I	CNP0043891_1_69	-15.8296
coconut	APO	4E	2W2I	CNP0182800_1_69	-15.8296
coconut	APO	4E	2W2I	CNP0215883_1_74	-15.8295
coconut	APO	4E	2W2I	CNP0068484_1_74	-15.8295
coconut	APO	4E	2W2I	CNP0175642_2_4	-15.8075
coconut	APO	4E	2W2I	CNP0184019_2_4	-15.8075
coconut	APO	4E	2W2I	CNP0368645_2_4	-15.8075
coconut	APO	4E	2W2I	CNP0054731_1_27	-15.7889
coconut	APO	4E	2W2I	CNP0262776_1_27	-15.7889
coconut	APO	4E	2W2I	CNP0072210_2_25	-15.7841
coconut	APO	4E	2W2I	CNP0072210_1_25	-15.7841
coconut	APO	4E	2W2I	CNP0072210_4_25	-15.7841
coconut	APO	4E	2W2I	CNP0072210_3_25	-15.7841
coconut	APO	4E	2W2I	CNP0268094_3_37	-15.7732
coconut	APO	4E	2W2I	CNP0268094_2_37	-15.7732
coconut	APO	4E	2W2I	CNP0103956_1_6	-15.7567
coconut	APO	4E	2W2I	CNP0238392_2_41	-15.744
coconut	APO	4E	2W2I	CNP0238392_3_44	-15.7356
coconut	APO	4E	2W2I	CNP0210555_1_70	-15.6966
coconut	APO	4E	2W2I	CNP0365801_1_17	-15.6953
coconut	APO	4E	2W2I	CNP0053284_1_17	-15.6953
coconut	APO	4E	2W2I	CNP0326677_3_27	-15.6809
coconut	APO	4E	2W2I	CNP0417114_1_187	-15.6611
coconut	APO	4E	2W2I	CNP0102501_2_101	-15.661
coconut	APO	4E	2W2I	CNP0238392_4_44	-15.661
coconut	APO	4E	2W2I	CNP0378977_1_21	-15.6443
coconut	APO	4E	2W2I	CNP0435990_2_25	-15.6343
coconut	APO	4E	2W2I	CNP0435990_4_25	-15.6343
coconut	APO	4E	2W2I	CNP0435990_3_25	-15.6343
coconut	APO	4E	2W2I	CNP0289599_1_63	-15.6306
coconut	APO	4E	2W2I	CNP0125603_2_59	-15.628
coconut	APO	4E	2W2I	CNP0408159_1_140	-15.6091
coconut	APO	4E	2W2I	CNP0249133_1_28	-15.6066
coconut	APO	4E	2W2I	CNP0042969_1_122	-15.6025
coconut	APO	4E	2W2I	CNP0257201_1_13	-15.6013
coconut	APO	4E	2W2I	CNP0411810_2_150	-14.7801
coconut	HOLO	4A	5F32	CNP0222564_1_24	-20.6225
coconut	HOLO	4A	5F32	CNP0150788_1_43	-20.5064
coconut	HOLO	4A	5F32	CNP0058667_1_43	-20.5064
coconut	HOLO	4A	5F32	CNP0303537_1_2	-20.2308
coconut	HOLO	4A	5F32	CNP0216191_1_116	-20.1967
coconut	HOLO	4A	5F32	CNP0002425_1_16	-20.1391
coconut	HOLO	4A	5F32	CNP0371131_1_182	-20.1132
coconut	HOLO	4A	5F32	CNP0359043_1_187	-20.0589
coconut	HOLO	4A	5F32	CNP0223133_1_38	-19.9276
coconut	HOLO	4A	5F32	CNP0308381_1_76	-19.8746
coconut	HOLO	4A	5F32	CNP0304362_1_103	-19.8611
coconut	HOLO	4A	5F32	CNP0128114_1_22	-19.8096
coconut	HOLO	4A	5F32	CNP0388108_1_50	-19.7606
coconut	HOLO	4A	5F32	CNP0419623_1_67	-19.7506
coconut	HOLO	4A	5F32	CNP0070170_4_178	-19.7495
coconut	HOLO	4A	5F32	CNP0070170_1_178	-19.7495
coconut	HOLO	4A	5F32	CNP0070170_2_178	-19.7495
coconut	HOLO	4A	5F32	CNP0070170_3_178	-19.7495
coconut	HOLO	4A	5F32	CNP0299696_1_8	-19.7493
coconut	HOLO	4A	5F32	CNP0230229_2_170	-19.7425
coconut	HOLO	4A	5F32	CNP0215480_1_137	-19.7157
coconut	HOLO	4A	5F32	CNP0262256_1_101	-19.6788
coconut	HOLO	4A	5F32	CNP0226280_1_184	-19.5908
coconut	HOLO	4A	5F32	CNP0288922_1_145	-19.5605
coconut	HOLO	4A	5F32	CNP0359434_1_96	-19.5554
coconut	HOLO	4A	5F32	CNP0312579_1_156	-19.5096
coconut	HOLO	4A	5F32	CNP0076373_1_8	-19.5062
coconut	HOLO	4A	5F32	CNP0225035_1_57	-19.4989
coconut	HOLO	4A	5F32	CNP0146658_1_7	-19.4112
coconut	HOLO	4A	5F32	CNP0285390_1_63	-19.3976
coconut	HOLO	4A	5F32	CNP0220995_1_75	-19.3817
coconut	HOLO	4A	5F32	CNP0203745_1_78	-19.361
coconut	HOLO	4A	5F32	CNP0137097_1_53	-19.3224
coconut	HOLO	4A	5F32	CNP0183807_1_150	-19.2953
coconut	HOLO	4A	5F32	CNP0034418_1_40	-19.2638
coconut	HOLO	4A	5F32	CNP0419146_1_104	-19.2565
coconut	HOLO	4A	5F32	CNP0423761_1_29	-19.2549
coconut	HOLO	4A	5F32	CNP0254909_1_27	-19.2519
coconut	HOLO	4A	5F32	CNP0424977_1_59	-19.2476
coconut	HOLO	4A	5F32	CNP0154417_1_51	-19.2459
coconut	HOLO	4A	5F32	CNP0210989_1_5	-19.2434
coconut	HOLO	4A	5F32	CNP0346620_1_12	-19.2348
coconut	HOLO	4A	5F32	CNP0410456_1_40	-19.2057
coconut	HOLO	4A	5F32	CNP0145882_1_2	-19.188
coconut	HOLO	4A	5F32	CNP0276176_1_34	-19.1723
coconut	HOLO	4A	5F32	CNP0365444_1_34	-19.1723
coconut	HOLO	4A	5F32	CNP0237320_1_1	-19.1049
coconut	HOLO	4A	5F32	CNP0199675_1_27	-19.086
coconut	HOLO	4A	5F32	CNP0028918_1_70	-19.0399
coconut	HOLO	4A	5F32	CNP0105928_1_77	-19.0115
coconut	HOLO	4A	5F32	CNP0218382_1_197	-19.0093
coconut	HOLO	4A	5F32	CNP0260658_1_55	-19.0059
coconut	HOLO	4A	5F32	CNP0125603_1_120	-18.9977
coconut	HOLO	4A	5F32	CNP0302804_1_114	-18.9696
coconut	HOLO	4A	5F32	CNP0079444_2_14	-18.9594
coconut	HOLO	4A	5F32	CNP0285133_1_199	-18.951
coconut	HOLO	4A	5F32	CNP0289604_1_114	-18.9423
coconut	HOLO	4A	5F32	CNP0077146_1_1	-18.9387
coconut	HOLO	4A	5F32	CNP0099882_1_52	-18.9373
coconut	HOLO	4A	5F32	CNP0230229_1_102	-18.9026
coconut	HOLO	4A	5F32	CNP0052972_1_25	-18.9018
coconut	HOLO	4A	5F32	CNP0021869_1_116	-18.8919
coconut	HOLO	4A	5F32	CNP0050396_1_4	-18.8897
coconut	HOLO	4A	5F32	CNP0289609_1_2	-18.8875
coconut	HOLO	4A	5F32	CNP0135679_1_52	-18.8699
coconut	HOLO	4A	5F32	CNP0215742_1_10	-18.8663
coconut	HOLO	4A	5F32	CNP0245053_1_144	-18.8395
coconut	HOLO	4A	5F32	CNP0324489_1_9	-18.8389
coconut	HOLO	4A	5F32	CNP0423929_1_112	-18.8321
coconut	HOLO	4A	5F32	CNP0228596_1_164	-18.8281
coconut	HOLO	4A	5F32	CNP0132701_1_91	-18.8207
coconut	HOLO	4A	5F32	CNP0132701_2_91	-18.8207
coconut	HOLO	4A	5F32	CNP0259668_1_91	-18.8207
coconut	HOLO	4A	5F32	CNP0298041_1_161	-18.8099
coconut	HOLO	4A	5F32	CNP0155799_1_36	-18.8022
coconut	HOLO	4A	5F32	CNP0155999_1_1	-18.783
coconut	HOLO	4A	5F32	CNP0173738_1_177	-18.7771
coconut	HOLO	4A	5F32	CNP0211501_1_193	-18.7602
coconut	HOLO	4A	5F32	CNP0237115_1_57	-18.7586
coconut	HOLO	4A	5F32	CNP0242064_1_111	-18.7479
coconut	HOLO	4A	5F32	CNP0206716_1_76	-18.7391
coconut	HOLO	4A	5F32	CNP0009877_1_44	-18.7328
coconut	HOLO	4A	5F32	CNP0346397_1_44	-18.7328
coconut	HOLO	4A	5F32	CNP0170892_1_64	-18.7314
coconut	HOLO	4A	5F32	CNP0184709_1_6	-18.7241
coconut	HOLO	4A	5F32	CNP0253826_1_70	-18.7192
coconut	HOLO	4A	5F32	CNP0243580_1_27	-18.7162
coconut	HOLO	4A	5F32	CNP0252810_1_178	-18.7115
coconut	HOLO	4A	5F32	CNP0144221_2_138	-18.7074
coconut	HOLO	4A	5F32	CNP0324174_1_46	-18.7029
coconut	HOLO	4A	5F32	CNP0095897_1_131	-18.7018
coconut	HOLO	4A	5F32	CNP0268374_1_131	-18.7018
coconut	HOLO	4A	5F32	CNP0275042_1_76	-18.7008
coconut	HOLO	4A	5F32	CNP0148933_1_174	-18.6872
coconut	HOLO	4A	5F32	CNP0130815_1_73	-18.6835
coconut	HOLO	4A	5F32	CNP0219813_1_118	-18.6752
coconut	HOLO	4A	5F32	CNP0232319_1_157	-18.6598
coconut	HOLO	4A	5F32	CNP0417515_1_72	-18.6448
coconut	HOLO	4A	5F32	CNP0107391_1_167	-18.6442
coconut	HOLO	4A	5F32	CNP0390949_1_85	-17.8913
coconut	HOLO	4B	4LXL	CNP0308381_1_52	-21.3053
coconut	HOLO	4B	4LXL	CNP0154417_1_32	-21.1512
coconut	HOLO	4B	4LXL	CNP0262256_1_101	-20.9603
coconut	HOLO	4B	4LXL	CNP0220995_1_75	-20.6902
coconut	HOLO	4B	4LXL	CNP0419623_1_67	-20.6365
coconut	HOLO	4B	4LXL	CNP0410456_1_40	-20.5068
coconut	HOLO	4B	4LXL	CNP0322725_1_148	-20.365
coconut	HOLO	4B	4LXL	CNP0424977_1_59	-20.1921
coconut	HOLO	4B	4LXL	CNP0216191_1_116	-20.1433
coconut	HOLO	4B	4LXL	CNP0222564_1_24	-20.1062
coconut	HOLO	4B	4LXL	CNP0042460_1_50	-20.0206
coconut	HOLO	4B	4LXL	CNP0399248_1_50	-19.9951
coconut	HOLO	4B	4LXL	CNP0304362_1_93	-19.8949
coconut	HOLO	4B	4LXL	CNP0257919_1_162	-19.8631
coconut	HOLO	4B	4LXL	CNP0232196_1_107	-19.8622
coconut	HOLO	4B	4LXL	CNP0206814_1_107	-19.8622
coconut	HOLO	4B	4LXL	CNP0098686_1_113	-19.8359
coconut	HOLO	4B	4LXL	CNP0389368_1_61	-19.8339
coconut	HOLO	4B	4LXL	CNP0267053_2_70	-19.779
coconut	HOLO	4B	4LXL	CNP0259668_1_39	-19.684
coconut	HOLO	4B	4LXL	CNP0132701_1_39	-19.684
coconut	HOLO	4B	4LXL	CNP0132701_2_39	-19.684
coconut	HOLO	4B	4LXL	CNP0316754_1_84	-19.6536
coconut	HOLO	4B	4LXL	CNP0184709_1_7	-19.6012
coconut	HOLO	4B	4LXL	CNP0346620_1_12	-19.5782
coconut	HOLO	4B	4LXL	CNP0021869_1_116	-19.5557
coconut	HOLO	4B	4LXL	CNP0107391_1_187	-19.5474
coconut	HOLO	4B	4LXL	CNP0239128_1_23	-19.5231
coconut	HOLO	4B	4LXL	CNP0119105_2_27	-19.4449
coconut	HOLO	4B	4LXL	CNP0417515_1_16	-19.4418
coconut	HOLO	4B	4LXL	CNP0283960_1_5	-19.4346
coconut	HOLO	4B	4LXL	CNP0424178_1_14	-19.415
coconut	HOLO	4B	4LXL	CNP0076062_1_12	-19.4145
coconut	HOLO	4B	4LXL	CNP0099882_1_48	-19.3806
coconut	HOLO	4B	4LXL	CNP0304580_1_159	-19.3764
coconut	HOLO	4B	4LXL	CNP0267053_1_75	-19.3486
coconut	HOLO	4B	4LXL	CNP0107860_1_64	-19.3375
coconut	HOLO	4B	4LXL	CNP0194622_1_51	-19.3323
coconut	HOLO	4B	4LXL	CNP0076179_1_6	-19.3053
coconut	HOLO	4B	4LXL	CNP0207153_1_97	-19.2596
coconut	HOLO	4B	4LXL	CNP0359434_1_61	-19.2567
coconut	HOLO	4B	4LXL	CNP0359459_1_103	-19.2377
coconut	HOLO	4B	4LXL	CNP0360795_2_35	-19.2319
coconut	HOLO	4B	4LXL	CNP0360795_1_35	-19.2319
coconut	HOLO	4B	4LXL	CNP0076179_2_9	-19.215
coconut	HOLO	4B	4LXL	CNP0347498_1_69	-19.2117
coconut	HOLO	4B	4LXL	CNP0359693_1_154	-19.2071
coconut	HOLO	4B	4LXL	CNP0299539_1_154	-19.2071
coconut	HOLO	4B	4LXL	CNP0367137_1_94	-19.2047
coconut	HOLO	4B	4LXL	CNP0180599_1_94	-19.2047
coconut	HOLO	4B	4LXL	CNP0070170_1_121	-19.1869
coconut	HOLO	4B	4LXL	CNP0070170_2_121	-19.1869
coconut	HOLO	4B	4LXL	CNP0070170_4_121	-19.1869
coconut	HOLO	4B	4LXL	CNP0070170_3_121	-19.1869
coconut	HOLO	4B	4LXL	CNP0394280_1_61	-19.1616
coconut	HOLO	4B	4LXL	CNP0303537_1_5	-19.153
coconut	HOLO	4B	4LXL	CNP0262228_1_5	-19.1357
coconut	HOLO	4B	4LXL	CNP0436114_1_147	-19.1285
coconut	HOLO	4B	4LXL	CNP0132156_1_94	-19.1256
coconut	HOLO	4B	4LXL	CNP0337304_1_12	-19.1123
coconut	HOLO	4B	4LXL	CNP0323682_1_12	-19.1075
coconut	HOLO	4B	4LXL	CNP0263824_1_137	-19.0943
coconut	HOLO	4B	4LXL	CNP0034418_1_40	-19.0877
coconut	HOLO	4B	4LXL	CNP0319966_1_29	-19.0684
coconut	HOLO	4B	4LXL	CNP0399235_1_41	-19.0452
coconut	HOLO	4B	4LXL	CNP0173762_1_73	-19.0326
coconut	HOLO	4B	4LXL	CNP0423761_1_2	-19.0169
coconut	HOLO	4B	4LXL	CNP0317278_1_175	-18.9917
coconut	HOLO	4B	4LXL	CNP0241055_1_2	-18.9833
coconut	HOLO	4B	4LXL	CNP0002425_1_33	-18.9786
coconut	HOLO	4B	4LXL	CNP0275914_1_191	-18.9702
coconut	HOLO	4B	4LXL	CNP0041540_1_181	-18.9554
coconut	HOLO	4B	4LXL	CNP0388108_1_50	-18.9531
coconut	HOLO	4B	4LXL	CNP0113067_1_185	-18.9021
coconut	HOLO	4B	4LXL	CNP0237320_1_1	-18.9
coconut	HOLO	4B	4LXL	CNP0091544_1_62	-18.8539
coconut	HOLO	4B	4LXL	CNP0205554_1_11	-18.8518
coconut	HOLO	4B	4LXL	CNP0218094_1_61	-18.8501
coconut	HOLO	4B	4LXL	CNP0345317_1_45	-18.8239
coconut	HOLO	4B	4LXL	CNP0425736_1_34	-18.7192
coconut	HOLO	4B	4LXL	CNP0148376_1_24	-18.7069
coconut	HOLO	4B	4LXL	CNP0155073_1_45	-18.6585
coconut	HOLO	4B	4LXL	CNP0231351_1_199	-18.6533
coconut	HOLO	4B	4LXL	CNP0331731_1_189	-18.628
coconut	HOLO	4B	4LXL	CNP0122809_1_42	-18.6245
coconut	HOLO	4B	4LXL	CNP0203745_1_70	-18.5825
coconut	HOLO	4B	4LXL	CNP0204497_1_137	-18.579
coconut	HOLO	4B	4LXL	CNP0299696_1_13	-18.5739
coconut	HOLO	4B	4LXL	CNP0189246_1_91	-18.5673
coconut	HOLO	4B	4LXL	CNP0401882_1_4	-18.5653
coconut	HOLO	4B	4LXL	CNP0405183_1_68	-18.5637
coconut	HOLO	4B	4LXL	CNP0180536_1_25	-18.563
coconut	HOLO	4B	4LXL	CNP0423753_1_95	-18.5513
coconut	HOLO	4B	4LXL	CNP0365884_1_33	-18.5512
coconut	HOLO	4B	4LXL	CNP0285156_1_21	-18.5417
coconut	HOLO	4B	4LXL	CNP0101063_1_146	-18.5395
coconut	HOLO	4B	4LXL	CNP0086281_1_146	-18.5395
coconut	HOLO	4B	4LXL	CNP0180640_1_2	-18.5365
coconut	HOLO	4B	4LXL	CNP0403201_1_13	-18.5211
coconut	HOLO	4B	4LXL	CNP0414653_1_137	-17.8121
coconut	HOLO	4C	2XML	CNP0210989_1_183	-21.9445
coconut	HOLO	4C	2XML	CNP0083624_1_59	-21.1928
coconut	HOLO	4C	2XML	CNP0304362_1_39	-20.9168
coconut	HOLO	4C	2XML	CNP0137097_1_14	-20.5925
coconut	HOLO	4C	2XML	CNP0076062_1_39	-20.5167
coconut	HOLO	4C	2XML	CNP0183807_1_120	-20.494
coconut	HOLO	4C	2XML	CNP0187735_1_4	-20.4198
coconut	HOLO	4C	2XML	CNP0362701_1_198	-20.1556
coconut	HOLO	4C	2XML	CNP0170892_1_6	-20.0671
coconut	HOLO	4C	2XML	CNP0170439_1_13	-20.0133
coconut	HOLO	4C	2XML	CNP0419623_1_67	-19.9498
coconut	HOLO	4C	2XML	CNP0173738_1_97	-19.8353
coconut	HOLO	4C	2XML	CNP0135415_1_98	-19.8266
coconut	HOLO	4C	2XML	CNP0417860_1_12	-19.8075
coconut	HOLO	4C	2XML	CNP0226280_1_117	-19.7565
coconut	HOLO	4C	2XML	CNP0424977_1_59	-19.7329
coconut	HOLO	4C	2XML	CNP0132701_1_26	-19.6855
coconut	HOLO	4C	2XML	CNP0259668_1_26	-19.6855
coconut	HOLO	4C	2XML	CNP0132701_2_26	-19.6855
coconut	HOLO	4C	2XML	CNP0303537_1_5	-19.5038
coconut	HOLO	4C	2XML	CNP0109274_1_167	-19.4966
coconut	HOLO	4C	2XML	CNP0417515_1_26	-19.4876
coconut	HOLO	4C	2XML	CNP0021869_1_116	-19.4844
coconut	HOLO	4C	2XML	CNP0226084_1_184	-19.4327
coconut	HOLO	4C	2XML	CNP0042460_1_50	-19.4251
coconut	HOLO	4C	2XML	CNP0410456_1_40	-19.3654
coconut	HOLO	4C	2XML	CNP0338916_1_174	-19.3504
coconut	HOLO	4C	2XML	CNP0423761_1_2	-19.3253
coconut	HOLO	4C	2XML	CNP0424178_1_14	-19.3084
coconut	HOLO	4C	2XML	CNP0067020_1_57	-19.2668
coconut	HOLO	4C	2XML	CNP0298305_1_47	-19.2131
coconut	HOLO	4C	2XML	CNP0215480_1_175	-19.1722
coconut	HOLO	4C	2XML	CNP0399248_1_51	-19.151
coconut	HOLO	4C	2XML	CNP0099882_1_52	-19.1426
coconut	HOLO	4C	2XML	CNP0262256_1_101	-19.1293
coconut	HOLO	4C	2XML	CNP0138517_1_71	-19.1075
coconut	HOLO	4C	2XML	CNP0359434_1_77	-19.0869
coconut	HOLO	4C	2XML	CNP0289146_1_6	-19.046
coconut	HOLO	4C	2XML	CNP0220995_1_75	-19.0333
coconut	HOLO	4C	2XML	CNP0350449_1_5	-18.9934
coconut	HOLO	4C	2XML	CNP0076794_1_150	-18.9654
coconut	HOLO	4C	2XML	CNP0274447_1_150	-18.9654
coconut	HOLO	4C	2XML	CNP0394280_1_56	-18.9229
coconut	HOLO	4C	2XML	CNP0106665_1_57	-18.8812
coconut	HOLO	4C	2XML	CNP0148933_1_67	-18.8673
coconut	HOLO	4C	2XML	CNP0337304_1_12	-18.858
coconut	HOLO	4C	2XML	CNP0235948_1_200	-18.815
coconut	HOLO	4C	2XML	CNP0136384_1_153	-18.8056
coconut	HOLO	4C	2XML	CNP0359693_1_141	-18.8043
coconut	HOLO	4C	2XML	CNP0299539_1_141	-18.8043
coconut	HOLO	4C	2XML	CNP0016052_1_80	-18.7969
coconut	HOLO	4C	2XML	CNP0419409_1_80	-18.7969
coconut	HOLO	4C	2XML	CNP0091544_1_172	-18.7903
coconut	HOLO	4C	2XML	CNP0389368_1_61	-18.7511
coconut	HOLO	4C	2XML	CNP0162890_1_26	-18.7337
coconut	HOLO	4C	2XML	CNP0347498_1_11	-18.6867
coconut	HOLO	4C	2XML	CNP0361901_1_42	-18.6765
coconut	HOLO	4C	2XML	CNP0045570_1_10	-18.6755
coconut	HOLO	4C	2XML	CNP0081356_1_10	-18.6755
coconut	HOLO	4C	2XML	CNP0160715_1_135	-18.6722
coconut	HOLO	4C	2XML	CNP0298041_1_144	-18.6716
coconut	HOLO	4C	2XML	CNP0184709_1_7	-18.6568
coconut	HOLO	4C	2XML	CNP0191626_1_51	-18.6389
coconut	HOLO	4C	2XML	CNP0119498_1_106	-18.5473
coconut	HOLO	4C	2XML	CNP0265773_1_85	-18.5404
coconut	HOLO	4C	2XML	CNP0267053_2_70	-18.5372
coconut	HOLO	4C	2XML	CNP0225035_1_57	-18.5188
coconut	HOLO	4C	2XML	CNP0260658_1_57	-18.5153
coconut	HOLO	4C	2XML	CNP0425660_1_197	-18.5057
coconut	HOLO	4C	2XML	CNP0059946_1_163	-18.5035
coconut	HOLO	4C	2XML	CNP0277876_1_163	-18.5035
coconut	HOLO	4C	2XML	CNP0344050_1_127	-18.4915
coconut	HOLO	4C	2XML	CNP0150513_1_68	-18.4658
coconut	HOLO	4C	2XML	CNP0120055_1_74	-18.4562
coconut	HOLO	4C	2XML	CNP0277876_3_196	-18.4167
coconut	HOLO	4C	2XML	CNP0059946_3_196	-18.4167
coconut	HOLO	4C	2XML	CNP0163914_1_34	-18.4034
coconut	HOLO	4C	2XML	CNP0257919_1_191	-18.3954
coconut	HOLO	4C	2XML	CNP0154417_1_34	-18.3937
coconut	HOLO	4C	2XML	CNP0315685_1_173	-18.3933
coconut	HOLO	4C	2XML	CNP0276176_1_34	-18.3905
coconut	HOLO	4C	2XML	CNP0365444_1_34	-18.3905
coconut	HOLO	4C	2XML	CNP0206814_1_29	-18.3686
coconut	HOLO	4C	2XML	CNP0232196_1_29	-18.3686
coconut	HOLO	4C	2XML	CNP0107752_1_3	-18.3668
coconut	HOLO	4C	2XML	CNP0346620_1_12	-18.3635
coconut	HOLO	4C	2XML	CNP0059946_2_18	-18.3563
coconut	HOLO	4C	2XML	CNP0277876_2_18	-18.3563
coconut	HOLO	4C	2XML	CNP0275914_1_191	-18.3554
coconut	HOLO	4C	2XML	CNP0123513_1_35	-18.3417
coconut	HOLO	4C	2XML	CNP0185235_1_122	-18.3392
coconut	HOLO	4C	2XML	CNP0203465_1_62	-18.3205
coconut	HOLO	4C	2XML	CNP0181746_1_63	-18.3172
coconut	HOLO	4C	2XML	CNP0070170_4_18	-18.3156
coconut	HOLO	4C	2XML	CNP0070170_3_18	-18.3156
coconut	HOLO	4C	2XML	CNP0070170_1_18	-18.3156
coconut	HOLO	4C	2XML	CNP0070170_2_18	-18.3156
coconut	HOLO	4C	2XML	CNP0360795_1_38	-18.2907
coconut	HOLO	4C	2XML	CNP0360795_2_38	-18.2907
coconut	HOLO	4C	2XML	CNP0316602_1_36	-17.3716
coconut	HOLO	4D	4HON	CNP0362352_1_24	-20.9692
coconut	HOLO	4D	4HON	CNP0303537_1_5	-20.9289
coconut	HOLO	4D	4HON	CNP0216191_1_116	-20.5545
coconut	HOLO	4D	4HON	CNP0203745_1_70	-20.4412
coconut	HOLO	4D	4HON	CNP0289604_1_115	-20.0586
coconut	HOLO	4D	4HON	CNP0410456_1_40	-19.9379
coconut	HOLO	4D	4HON	CNP0081446_1_69	-19.8287
coconut	HOLO	4D	4HON	CNP0399248_1_50	-19.8263
coconut	HOLO	4D	4HON	CNP0262256_1_79	-19.7857
coconut	HOLO	4D	4HON	CNP0002425_1_16	-19.7326
coconut	HOLO	4D	4HON	CNP0028918_1_73	-19.7077
coconut	HOLO	4D	4HON	CNP0128114_1_87	-19.6989
coconut	HOLO	4D	4HON	CNP0397301_1_61	-19.6352
coconut	HOLO	4D	4HON	CNP0197577_1_61	-19.6352
coconut	HOLO	4D	4HON	CNP0313969_1_40	-19.6228
coconut	HOLO	4D	4HON	CNP0424977_1_59	-19.4933
coconut	HOLO	4D	4HON	CNP0207153_1_103	-19.4525
coconut	HOLO	4D	4HON	CNP0299696_1_6	-19.4308
coconut	HOLO	4D	4HON	CNP0419623_1_67	-19.4066
coconut	HOLO	4D	4HON	CNP0067020_1_57	-19.4022
coconut	HOLO	4D	4HON	CNP0226280_1_43	-19.398
coconut	HOLO	4D	4HON	CNP0176142_1_141	-19.3051
coconut	HOLO	4D	4HON	CNP0151675_1_5	-19.2879
coconut	HOLO	4D	4HON	CNP0210989_1_127	-19.2439
coconut	HOLO	4D	4HON	CNP0260658_1_60	-19.1858
coconut	HOLO	4D	4HON	CNP0343768_1_29	-19.1642
coconut	HOLO	4D	4HON	CNP0318626_1_73	-19.1401
coconut	HOLO	4D	4HON	CNP0115655_2_191	-19.1058
coconut	HOLO	4D	4HON	CNP0148933_1_67	-19.0898
coconut	HOLO	4D	4HON	CNP0226250_1_8	-19.0802
coconut	HOLO	4D	4HON	CNP0170439_1_190	-19.0037
coconut	HOLO	4D	4HON	CNP0424602_1_141	-18.9878
coconut	HOLO	4D	4HON	CNP0038082_1_141	-18.9878
coconut	HOLO	4D	4HON	CNP0155799_1_16	-18.9765
coconut	HOLO	4D	4HON	CNP0155999_1_32	-18.9506
coconut	HOLO	4D	4HON	CNP0135415_1_39	-18.9249
coconut	HOLO	4D	4HON	CNP0150788_1_56	-18.9238
coconut	HOLO	4D	4HON	CNP0058667_1_56	-18.9238
coconut	HOLO	4D	4HON	CNP0137097_1_68	-18.9238
coconut	HOLO	4D	4HON	CNP0184709_1_7	-18.8894
coconut	HOLO	4D	4HON	CNP0394280_1_56	-18.8747
coconut	HOLO	4D	4HON	CNP0276176_1_34	-18.7749
coconut	HOLO	4D	4HON	CNP0365444_1_34	-18.7749
coconut	HOLO	4D	4HON	CNP0243580_1_40	-18.7711
coconut	HOLO	4D	4HON	CNP0254909_1_31	-18.6866
coconut	HOLO	4D	4HON	CNP0283498_1_70	-18.6462
coconut	HOLO	4D	4HON	CNP0095409_1_164	-18.6305
coconut	HOLO	4D	4HON	CNP0021856_1_42	-18.6278
coconut	HOLO	4D	4HON	CNP0079089_1_50	-18.6044
coconut	HOLO	4D	4HON	CNP0223556_1_159	-18.539
coconut	HOLO	4D	4HON	CNP0134196_1_106	-18.518
coconut	HOLO	4D	4HON	CNP0278027_1_194	-18.4933
coconut	HOLO	4D	4HON	CNP0347498_1_69	-18.4863
coconut	HOLO	4D	4HON	CNP0420965_1_49	-18.4684
coconut	HOLO	4D	4HON	CNP0299539_1_141	-18.4462
coconut	HOLO	4D	4HON	CNP0359693_1_141	-18.4462
coconut	HOLO	4D	4HON	CNP0139284_1_39	-18.4385
coconut	HOLO	4D	4HON	CNP0146870_1_93	-18.437
coconut	HOLO	4D	4HON	CNP0099882_1_48	-18.4045
coconut	HOLO	4D	4HON	CNP0021869_1_116	-18.4026
coconut	HOLO	4D	4HON	CNP0296218_1_23	-18.3965
coconut	HOLO	4D	4HON	CNP0275927_1_38	-18.3751
coconut	HOLO	4D	4HON	CNP0285138_1_3	-18.3321
coconut	HOLO	4D	4HON	CNP0300270_1_22	-18.3026
coconut	HOLO	4D	4HON	CNP0107128_1_182	-18.2986
coconut	HOLO	4D	4HON	CNP0319032_1_117	-18.2947
coconut	HOLO	4D	4HON	CNP0309423_1_102	-18.2802
coconut	HOLO	4D	4HON	CNP0141308_1_31	-18.2448
coconut	HOLO	4D	4HON	CNP0434953_1_2	-18.2314
coconut	HOLO	4D	4HON	CNP0113067_1_135	-18.2279
coconut	HOLO	4D	4HON	CNP0312579_1_156	-18.2216
coconut	HOLO	4D	4HON	CNP0359340_1_34	-18.2046
coconut	HOLO	4D	4HON	CNP0359434_1_96	-18.1957
coconut	HOLO	4D	4HON	CNP0312143_1_119	-18.1904
coconut	HOLO	4D	4HON	CNP0237320_1_1	-18.1664
coconut	HOLO	4D	4HON	CNP0120971_1_122	-18.1612
coconut	HOLO	4D	4HON	CNP0198676_1_185	-18.1598
coconut	HOLO	4D	4HON	CNP0346397_1_44	-18.157
coconut	HOLO	4D	4HON	CNP0009877_1_44	-18.157
coconut	HOLO	4D	4HON	CNP0155073_1_45	-18.1478
coconut	HOLO	4D	4HON	CNP0424178_1_14	-18.1312
coconut	HOLO	4D	4HON	CNP0285156_1_61	-18.1148
coconut	HOLO	4D	4HON	CNP0434953_2_2	-18.1127
coconut	HOLO	4D	4HON	CNP0262427_1_5	-18.1123
coconut	HOLO	4D	4HON	CNP0143172_1_100	-18.1091
coconut	HOLO	4D	4HON	CNP0217093_1_170	-18.104
coconut	HOLO	4D	4HON	CNP0267053_2_103	-18.0917
coconut	HOLO	4D	4HON	CNP0083624_1_7	-18.068
coconut	HOLO	4D	4HON	CNP0410458_1_36	-18.068
coconut	HOLO	4D	4HON	CNP0203170_1_5	-18.0539
coconut	HOLO	4D	4HON	CNP0238696_1_107	-18.0509
coconut	HOLO	4D	4HON	CNP0302804_1_124	-18.0483
coconut	HOLO	4D	4HON	CNP0092234_1_16	-18.0173
coconut	HOLO	4D	4HON	CNP0131606_1_14	-18.0143
coconut	HOLO	4D	4HON	CNP0299329_1_23	-18.0114
coconut	HOLO	4D	4HON	CNP0162296_1_52	-18.0023
coconut	HOLO	4D	4HON	CNP0266169_1_39	-18.0018
coconut	HOLO	4D	4HON	CNP0257919_1_179	-17.9987
coconut	HOLO	4D	4HON	CNP0213914_1_116	-17.99
coconut	HOLO	4D	4HON	CNP0232196_1_107	-17.2279
coconut	HOLO	4D	4HOO	CNP0002425_1_16	-20.9985
coconut	HOLO	4D	4HOO	CNP0243580_1_40	-20.578
coconut	HOLO	4D	4HOO	CNP0299539_1_93	-20.5285
coconut	HOLO	4D	4HOO	CNP0359693_1_93	-20.5285
coconut	HOLO	4D	4HOO	CNP0155799_1_47	-20.3666
coconut	HOLO	4D	4HOO	CNP0002873_1_13	-20.2789
coconut	HOLO	4D	4HOO	CNP0424977_1_59	-20.2308
coconut	HOLO	4D	4HOO	CNP0216191_1_93	-20.1421
coconut	HOLO	4D	4HOO	CNP0410456_1_40	-19.9984
coconut	HOLO	4D	4HOO	CNP0399248_1_51	-19.994
coconut	HOLO	4D	4HOO	CNP0028918_1_73	-19.964
coconut	HOLO	4D	4HOO	CNP0115655_2_191	-19.9312
coconut	HOLO	4D	4HOO	CNP0262256_1_101	-19.906
coconut	HOLO	4D	4HOO	CNP0394280_1_56	-19.8254
coconut	HOLO	4D	4HOO	CNP0180599_1_100	-19.8146
coconut	HOLO	4D	4HOO	CNP0367137_1_100	-19.8146
coconut	HOLO	4D	4HOO	CNP0245053_1_51	-19.7427
coconut	HOLO	4D	4HOO	CNP0419623_1_67	-19.7368
coconut	HOLO	4D	4HOO	CNP0337304_1_15	-19.7187
coconut	HOLO	4D	4HOO	CNP0009877_1_44	-19.718
coconut	HOLO	4D	4HOO	CNP0346397_1_44	-19.718
coconut	HOLO	4D	4HOO	CNP0260658_1_55	-19.7071
coconut	HOLO	4D	4HOO	CNP0362352_1_24	-19.659
coconut	HOLO	4D	4HOO	CNP0155999_1_1	-19.6584
coconut	HOLO	4D	4HOO	CNP0237115_1_57	-19.6493
coconut	HOLO	4D	4HOO	CNP0207153_1_103	-19.6391
coconut	HOLO	4D	4HOO	CNP0347498_1_69	-19.6391
coconut	HOLO	4D	4HOO	CNP0128114_1_154	-19.639
coconut	HOLO	4D	4HOO	CNP0242064_1_111	-19.6167
coconut	HOLO	4D	4HOO	CNP0424178_1_14	-19.6111
coconut	HOLO	4D	4HOO	CNP0303537_1_2	-19.4585
coconut	HOLO	4D	4HOO	CNP0278027_1_194	-19.4258
coconut	HOLO	4D	4HOO	CNP0183809_1_151	-19.4254
coconut	HOLO	4D	4HOO	CNP0148933_1_174	-19.4123
coconut	HOLO	4D	4HOO	CNP0253826_1_69	-19.409
coconut	HOLO	4D	4HOO	CNP0226280_1_43	-19.2998
coconut	HOLO	4D	4HOO	CNP0233996_1_118	-19.2506
coconut	HOLO	4D	4HOO	CNP0312579_1_127	-19.2486
coconut	HOLO	4D	4HOO	CNP0338225_1_25	-19.2058
coconut	HOLO	4D	4HOO	CNP0283498_1_43	-19.2049
coconut	HOLO	4D	4HOO	CNP0304580_1_166	-19.165
coconut	HOLO	4D	4HOO	CNP0137097_1_74	-19.1519
coconut	HOLO	4D	4HOO	CNP0318626_1_73	-19.1222
coconut	HOLO	4D	4HOO	CNP0267053_2_103	-19.0553
coconut	HOLO	4D	4HOO	CNP0076062_1_108	-19.0162
coconut	HOLO	4D	4HOO	CNP0223556_1_159	-19.0008
coconut	HOLO	4D	4HOO	CNP0388516_1_58	-18.9985
coconut	HOLO	4D	4HOO	CNP0203745_1_70	-18.9903
coconut	HOLO	4D	4HOO	CNP0142499_1_186	-18.921
coconut	HOLO	4D	4HOO	CNP0210989_1_78	-18.9087
coconut	HOLO	4D	4HOO	CNP0316754_1_93	-18.9016
coconut	HOLO	4D	4HOO	CNP0173738_1_177	-18.8906
coconut	HOLO	4D	4HOO	CNP0080740_1_47	-18.8839
coconut	HOLO	4D	4HOO	CNP0430335_3_56	-18.8741
coconut	HOLO	4D	4HOO	CNP0085703_1_40	-18.8498
coconut	HOLO	4D	4HOO	CNP0299696_1_8	-18.8474
coconut	HOLO	4D	4HOO	CNP0289604_1_43	-18.846
coconut	HOLO	4D	4HOO	CNP0099882_1_52	-18.8173
coconut	HOLO	4D	4HOO	CNP0237320_1_1	-18.8072
coconut	HOLO	4D	4HOO	CNP0388108_1_50	-18.806
coconut	HOLO	4D	4HOO	CNP0021869_1_150	-18.7975
coconut	HOLO	4D	4HOO	CNP0187205_1_52	-18.7864
coconut	HOLO	4D	4HOO	CNP0221280_1_151	-18.7583
coconut	HOLO	4D	4HOO	CNP0365444_1_34	-18.7428
coconut	HOLO	4D	4HOO	CNP0276176_1_34	-18.7428
coconut	HOLO	4D	4HOO	CNP0125603_1_122	-18.7336
coconut	HOLO	4D	4HOO	CNP0150788_1_43	-18.7044
coconut	HOLO	4D	4HOO	CNP0058667_1_43	-18.7044
coconut	HOLO	4D	4HOO	CNP0410458_1_36	-18.6847
coconut	HOLO	4D	4HOO	CNP0154417_1_4	-18.6572
coconut	HOLO	4D	4HOO	CNP0183446_1_82	-18.6498
coconut	HOLO	4D	4HOO	CNP0125603_2_88	-18.6462
coconut	HOLO	4D	4HOO	CNP0420965_1_49	-18.6419
coconut	HOLO	4D	4HOO	CNP0285515_1_58	-18.6322
coconut	HOLO	4D	4HOO	CNP0425755_1_118	-18.613
coconut	HOLO	4D	4HOO	CNP0353392_1_83	-18.6076
coconut	HOLO	4D	4HOO	CNP0076373_1_8	-18.6029
coconut	HOLO	4D	4HOO	CNP0248483_1_48	-18.5909
coconut	HOLO	4D	4HOO	CNP0092234_1_107	-18.5825
coconut	HOLO	4D	4HOO	CNP0270142_1_84	-18.5767
coconut	HOLO	4D	4HOO	CNP0169399_1_38	-18.5534
coconut	HOLO	4D	4HOO	CNP0222622_1_164	-18.5504
coconut	HOLO	4D	4HOO	CNP0184709_1_7	-18.524
coconut	HOLO	4D	4HOO	CNP0363646_1_171	-18.514
coconut	HOLO	4D	4HOO	CNP0118070_1_53	-18.4853
coconut	HOLO	4D	4HOO	CNP0050396_1_9	-18.467
coconut	HOLO	4D	4HOO	CNP0308381_1_76	-18.4594
coconut	HOLO	4D	4HOO	CNP0079089_1_50	-18.4553
coconut	HOLO	4D	4HOO	CNP0360795_1_38	-18.4334
coconut	HOLO	4D	4HOO	CNP0360795_2_38	-18.4334
coconut	HOLO	4D	4HOO	CNP0423761_1_75	-18.4276
coconut	HOLO	4D	4HOO	CNP0026079_1_119	-18.419
coconut	HOLO	4D	4HOO	CNP0405122_1_119	-18.419
coconut	HOLO	4D	4HOO	CNP0436114_1_147	-18.4118
coconut	HOLO	4D	4HOO	CNP0081446_1_69	-18.4116
coconut	HOLO	4D	4HOO	CNP0112570_1_94	-18.3928
coconut	HOLO	4D	4HOO	CNP0208686_1_57	-18.388
coconut	HOLO	4D	4HOO	CNP0232196_1_3	-18.3815
coconut	HOLO	4D	4HOO	CNP0206814_1_3	-18.3815
coconut	HOLO	4D	4HOO	CNP0434953_1_2	-17.5676
coconut	HOLO	4D	5F5C	CNP0303537_1_5	-20.4552
coconut	HOLO	4D	5F5C	CNP0337304_1_12	-20.3156
coconut	HOLO	4D	5F5C	CNP0197577_1_61	-20.2674
coconut	HOLO	4D	5F5C	CNP0397301_1_61	-20.2674
coconut	HOLO	4D	5F5C	CNP0417515_1_42	-19.9654
coconut	HOLO	4D	5F5C	CNP0120055_1_180	-19.9402
coconut	HOLO	4D	5F5C	CNP0216191_1_116	-19.5371
coconut	HOLO	4D	5F5C	CNP0262996_1_19	-19.3718
coconut	HOLO	4D	5F5C	CNP0137097_1_126	-19.287
coconut	HOLO	4D	5F5C	CNP0143053_1_7	-19.229
coconut	HOLO	4D	5F5C	CNP0002425_1_33	-19.1336
coconut	HOLO	4D	5F5C	CNP0228520_1_194	-19.1027
coconut	HOLO	4D	5F5C	CNP0165015_1_50	-19.0994
coconut	HOLO	4D	5F5C	CNP0083624_1_67	-19.0514
coconut	HOLO	4D	5F5C	CNP0191941_1_119	-19.0445
coconut	HOLO	4D	5F5C	CNP0265773_1_106	-19.0424
coconut	HOLO	4D	5F5C	CNP0076062_1_78	-18.988
coconut	HOLO	4D	5F5C	CNP0091544_1_75	-18.8896
coconut	HOLO	4D	5F5C	CNP0317472_1_175	-18.8839
coconut	HOLO	4D	5F5C	CNP0153886_1_188	-18.8046
coconut	HOLO	4D	5F5C	CNP0085401_1_163	-18.7802
coconut	HOLO	4D	5F5C	CNP0162890_1_42	-18.7485
coconut	HOLO	4D	5F5C	CNP0170439_1_186	-18.746
coconut	HOLO	4D	5F5C	CNP0306548_1_35	-18.681
coconut	HOLO	4D	5F5C	CNP0211501_1_108	-18.6254
coconut	HOLO	4D	5F5C	CNP0272980_1_128	-18.6077
coconut	HOLO	4D	5F5C	CNP0424977_1_59	-18.6052
coconut	HOLO	4D	5F5C	CNP0237320_1_1	-18.5734
coconut	HOLO	4D	5F5C	CNP0400870_1_14	-18.5729
coconut	HOLO	4D	5F5C	CNP0075166_1_87	-18.5449
coconut	HOLO	4D	5F5C	CNP0299916_1_86	-18.5411
coconut	HOLO	4D	5F5C	CNP0362701_1_63	-18.5357
coconut	HOLO	4D	5F5C	CNP0137175_1_20	-18.5313
coconut	HOLO	4D	5F5C	CNP0299696_1_8	-18.5262
coconut	HOLO	4D	5F5C	CNP0310243_1_18	-18.5177
coconut	HOLO	4D	5F5C	CNP0262256_1_79	-18.4463
coconut	HOLO	4D	5F5C	CNP0229426_1_15	-18.404
coconut	HOLO	4D	5F5C	CNP0403201_1_31	-18.3628
coconut	HOLO	4D	5F5C	CNP0347498_1_69	-18.3412
coconut	HOLO	4D	5F5C	CNP0278959_1_27	-18.3405
coconut	HOLO	4D	5F5C	CNP0049837_1_49	-18.3169
coconut	HOLO	4D	5F5C	CNP0327529_1_44	-18.3159
coconut	HOLO	4D	5F5C	CNP0419623_1_67	-18.3018
coconut	HOLO	4D	5F5C	CNP0081446_1_68	-18.2778
coconut	HOLO	4D	5F5C	CNP0227938_1_53	-18.2377
coconut	HOLO	4D	5F5C	CNP0256310_1_18	-18.2321
coconut	HOLO	4D	5F5C	CNP0001343_1_70	-18.2294
coconut	HOLO	4D	5F5C	CNP0148082_1_175	-18.1572
coconut	HOLO	4D	5F5C	CNP0210555_1_91	-18.1456
coconut	HOLO	4D	5F5C	CNP0262427_1_5	-18.1386
coconut	HOLO	4D	5F5C	CNP0109021_1_1	-18.1234
coconut	HOLO	4D	5F5C	CNP0132701_2_44	-18.0919
coconut	HOLO	4D	5F5C	CNP0132701_1_44	-18.0919
coconut	HOLO	4D	5F5C	CNP0259668_1_44	-18.0919
coconut	HOLO	4D	5F5C	CNP0309407_1_92	-18.0859
coconut	HOLO	4D	5F5C	CNP0251454_1_85	-18.0735
coconut	HOLO	4D	5F5C	CNP0138585_1_85	-18.0735
coconut	HOLO	4D	5F5C	CNP0285752_1_85	-18.0735
coconut	HOLO	4D	5F5C	CNP0203745_1_23	-18.0561
coconut	HOLO	4D	5F5C	CNP0203170_1_55	-18.0482
coconut	HOLO	4D	5F5C	CNP0238132_1_96	-18.0359
coconut	HOLO	4D	5F5C	CNP0184709_1_7	-18.0196
coconut	HOLO	4D	5F5C	CNP0050259_1_179	-18.0152
coconut	HOLO	4D	5F5C	CNP0125603_2_118	-17.9753
coconut	HOLO	4D	5F5C	CNP0122256_1_53	-17.9492
coconut	HOLO	4D	5F5C	CNP0135360_1_71	-17.9461
coconut	HOLO	4D	5F5C	CNP0118054_1_95	-17.9406
coconut	HOLO	4D	5F5C	CNP0148151_1_89	-17.9057
coconut	HOLO	4D	5F5C	CNP0289016_1_173	-17.8536
coconut	HOLO	4D	5F5C	CNP0222622_1_161	-17.8501
coconut	HOLO	4D	5F5C	CNP0024392_1_76	-17.8404
coconut	HOLO	4D	5F5C	CNP0196709_1_76	-17.8404
coconut	HOLO	4D	5F5C	CNP0413889_1_71	-17.8256
coconut	HOLO	4D	5F5C	CNP0244961_1_59	-17.8059
coconut	HOLO	4D	5F5C	CNP0287632_1_59	-17.8059
coconut	HOLO	4D	5F5C	CNP0067020_1_70	-17.8033
coconut	HOLO	4D	5F5C	CNP0266169_1_146	-17.796
coconut	HOLO	4D	5F5C	CNP0396586_1_199	-17.7896
coconut	HOLO	4D	5F5C	CNP0114388_1_14	-17.7808
coconut	HOLO	4D	5F5C	CNP0235948_1_200	-17.7695
coconut	HOLO	4D	5F5C	CNP0062641_1_69	-17.7576
coconut	HOLO	4D	5F5C	CNP0304433_1_69	-17.7576
coconut	HOLO	4D	5F5C	CNP0183807_1_14	-17.7305
coconut	HOLO	4D	5F5C	CNP0244462_1_110	-17.7135
coconut	HOLO	4D	5F5C	CNP0130094_1_28	-17.6958
coconut	HOLO	4D	5F5C	CNP0093729_1_11	-17.6922
coconut	HOLO	4D	5F5C	CNP0353392_1_83	-17.6895
coconut	HOLO	4D	5F5C	CNP0300062_1_117	-17.6892
coconut	HOLO	4D	5F5C	CNP0094878_1_51	-17.6724
coconut	HOLO	4D	5F5C	CNP0352577_1_63	-17.6606
coconut	HOLO	4D	5F5C	CNP0313969_1_40	-17.6557
coconut	HOLO	4D	5F5C	CNP0182729_1_27	-17.6483
coconut	HOLO	4D	5F5C	CNP0061120_1_27	-17.6483
coconut	HOLO	4D	5F5C	CNP0002697_1_25	-17.6363
coconut	HOLO	4D	5F5C	CNP0239991_1_102	-17.6309
coconut	HOLO	4D	5F5C	CNP0399248_1_50	-17.6135
coconut	HOLO	4D	5F5C	CNP0424169_1_4	-17.6115
coconut	HOLO	4D	5F5C	CNP0158026_1_31	-17.6092
coconut	HOLO	4D	5F5C	CNP0080749_1_182	-17.6083
coconut	HOLO	4D	5F5C	CNP0262228_1_10	-16.8325
coconut	HOLO	4D	5FP4	CNP0299696_1_14	-21.0898
coconut	HOLO	4D	5FP4	CNP0303537_1_5	-20.6139
coconut	HOLO	4D	5FP4	CNP0151675_1_5	-20.0156
coconut	HOLO	4D	5FP4	CNP0211501_1_198	-19.3866
coconut	HOLO	4D	5FP4	CNP0044880_1_70	-19.3306
coconut	HOLO	4D	5FP4	CNP0337304_1_12	-19.2291
coconut	HOLO	4D	5FP4	CNP0164312_1_54	-18.9734
coconut	HOLO	4D	5FP4	CNP0309257_1_155	-18.9409
coconut	HOLO	4D	5FP4	CNP0001343_1_70	-18.8705
coconut	HOLO	4D	5FP4	CNP0076062_1_78	-18.8627
coconut	HOLO	4D	5FP4	CNP0195857_1_9	-18.7921
coconut	HOLO	4D	5FP4	CNP0417515_1_42	-18.7869
coconut	HOLO	4D	5FP4	CNP0347498_1_69	-18.7742
coconut	HOLO	4D	5FP4	CNP0257919_1_191	-18.649
coconut	HOLO	4D	5FP4	CNP0148933_1_67	-18.5578
coconut	HOLO	4D	5FP4	CNP0237320_1_5	-18.4955
coconut	HOLO	4D	5FP4	CNP0143053_1_24	-18.4469
coconut	HOLO	4D	5FP4	CNP0128114_1_148	-18.4369
coconut	HOLO	4D	5FP4	CNP0045283_1_110	-18.4324
coconut	HOLO	4D	5FP4	CNP0419623_1_67	-18.3875
coconut	HOLO	4D	5FP4	CNP0315877_1_99	-18.3811
coconut	HOLO	4D	5FP4	CNP0361901_1_166	-18.3524
coconut	HOLO	4D	5FP4	CNP0170439_1_190	-18.2844
coconut	HOLO	4D	5FP4	CNP0331731_1_189	-18.2299
coconut	HOLO	4D	5FP4	CNP0221792_1_156	-18.218
coconut	HOLO	4D	5FP4	CNP0424977_1_59	-18.1343
coconut	HOLO	4D	5FP4	CNP0362701_1_198	-18.1223
coconut	HOLO	4D	5FP4	CNP0403482_1_185	-18.0924
coconut	HOLO	4D	5FP4	CNP0400870_1_14	-18.0476
coconut	HOLO	4D	5FP4	CNP0122256_1_53	-18.0408
coconut	HOLO	4D	5FP4	CNP0371566_1_79	-18.0206
coconut	HOLO	4D	5FP4	CNP0424178_1_14	-18.0062
coconut	HOLO	4D	5FP4	CNP0333305_1_56	-17.9972
coconut	HOLO	4D	5FP4	CNP0191417_1_186	-17.994
coconut	HOLO	4D	5FP4	CNP0182113_1_2	-17.9859
coconut	HOLO	4D	5FP4	CNP0149152_1_100	-17.983
coconut	HOLO	4D	5FP4	CNP0216264_1_30	-17.978
coconut	HOLO	4D	5FP4	CNP0317472_1_144	-17.9716
coconut	HOLO	4D	5FP4	CNP0162890_1_42	-17.9629
coconut	HOLO	4D	5FP4	CNP0165015_1_50	-17.9306
coconut	HOLO	4D	5FP4	CNP0141308_1_44	-17.9281
coconut	HOLO	4D	5FP4	CNP0262996_1_19	-17.9173
coconut	HOLO	4D	5FP4	CNP0410456_1_40	-17.8839
coconut	HOLO	4D	5FP4	CNP0021869_1_116	-17.8834
coconut	HOLO	4D	5FP4	CNP0042460_1_189	-17.8633
coconut	HOLO	4D	5FP4	CNP0197577_1_61	-17.8522
coconut	HOLO	4D	5FP4	CNP0397301_1_61	-17.8522
coconut	HOLO	4D	5FP4	CNP0149863_1_2	-17.8503
coconut	HOLO	4D	5FP4	CNP0075375_1_49	-17.8368
coconut	HOLO	4D	5FP4	CNP0186748_1_102	-17.7906
coconut	HOLO	4D	5FP4	CNP0359693_1_141	-17.7626
coconut	HOLO	4D	5FP4	CNP0299539_1_141	-17.7626
coconut	HOLO	4D	5FP4	CNP0299564_1_151	-17.7423
coconut	HOLO	4D	5FP4	CNP0151329_1_137	-17.7405
coconut	HOLO	4D	5FP4	CNP0083256_2_152	-17.7059
coconut	HOLO	4D	5FP4	CNP0284825_1_90	-17.6941
coconut	HOLO	4D	5FP4	CNP0215480_1_170	-17.6897
coconut	HOLO	4D	5FP4	CNP0084774_1_47	-17.686
coconut	HOLO	4D	5FP4	CNP0399248_1_50	-17.681
coconut	HOLO	4D	5FP4	CNP0272980_1_128	-17.6766
coconut	HOLO	4D	5FP4	CNP0170892_1_180	-17.6355
coconut	HOLO	4D	5FP4	CNP0410458_1_26	-17.6248
coconut	HOLO	4D	5FP4	CNP0192941_1_156	-17.6112
coconut	HOLO	4D	5FP4	CNP0107128_1_175	-17.5798
coconut	HOLO	4D	5FP4	CNP0119840_1_165	-17.5589
coconut	HOLO	4D	5FP4	CNP0253888_1_169	-17.5554
coconut	HOLO	4D	5FP4	CNP0304433_1_71	-17.5434
coconut	HOLO	4D	5FP4	CNP0062641_1_71	-17.5434
coconut	HOLO	4D	5FP4	CNP0107860_1_64	-17.5291
coconut	HOLO	4D	5FP4	CNP0230116_1_7	-17.5234
coconut	HOLO	4D	5FP4	CNP0180640_1_2	-17.5145
coconut	HOLO	4D	5FP4	CNP0159349_1_118	-17.5011
coconut	HOLO	4D	5FP4	CNP0299916_1_86	-17.4975
coconut	HOLO	4D	5FP4	CNP0120574_1_18	-17.4958
coconut	HOLO	4D	5FP4	CNP0403201_1_31	-17.4735
coconut	HOLO	4D	5FP4	CNP0294315_1_4	-17.4714
coconut	HOLO	4D	5FP4	CNP0315964_1_44	-17.4594
coconut	HOLO	4D	5FP4	CNP0253986_1_153	-17.4451
coconut	HOLO	4D	5FP4	CNP0346013_1_153	-17.4451
coconut	HOLO	4D	5FP4	CNP0210989_1_78	-17.4407
coconut	HOLO	4D	5FP4	CNP0289609_1_2	-17.4354
coconut	HOLO	4D	5FP4	CNP0226749_1_55	-17.4303
coconut	HOLO	4D	5FP4	CNP0203170_1_55	-17.4299
coconut	HOLO	4D	5FP4	CNP0208987_1_17	-17.4161
coconut	HOLO	4D	5FP4	CNP0238182_1_82	-17.4136
coconut	HOLO	4D	5FP4	CNP0083624_1_50	-17.4132
coconut	HOLO	4D	5FP4	CNP0262256_1_79	-17.4104
coconut	HOLO	4D	5FP4	CNP0216191_1_116	-17.4064
coconut	HOLO	4D	5FP4	CNP0308688_1_50	-17.3837
coconut	HOLO	4D	5FP4	CNP0184709_1_7	-17.3765
coconut	HOLO	4D	5FP4	CNP0259668_1_44	-17.3727
coconut	HOLO	4D	5FP4	CNP0132701_1_44	-17.3727
coconut	HOLO	4D	5FP4	CNP0132701_2_44	-17.3727
coconut	HOLO	4D	5FP4	CNP0316602_1_17	-17.3721
coconut	HOLO	4D	5FP4	CNP0096883_1_32	-17.3718
coconut	HOLO	4D	5FP4	CNP0191941_1_147	-17.3586
coconut	HOLO	4D	5FP4	CNP0118773_1_101	-17.3406
coconut	HOLO	4D	5FP4	CNP0309407_1_191	-17.3397
[truncated: 5,802 more rows]
